# Supplementary material for: The reactivity of N-heterocyclic diphospholenes towards iron triad carbonyls
Source: Royal Society of Chemistry journal article supplement (doi:10.1039/d3nj00450c), 2023-01-01
Supplement: d3nj00450c2.pdf [file d3nj00450c2.pdf]

## The reactivity of N-heterocyclic diphospholenes towards iron triad carbonyls

Gennady G. Kazakov <sup>a,b</sup>, Nikolay O. Druzhkov <sup>a</sup>, Roman V. Rumyantsev <sup>a</sup>, Georgy K. Fukin <sup>a</sup>,  
Andrey G. Starikov <sup>c</sup>, Alexandr V. Piskunov <sup>a,\*</sup>, Vladimir K. Cherkasov <sup>a</sup>.

<sup>a</sup> *G.A. Razuvaev Institute of Organometallic Chemistry, Russian Academy of Sciences, Nizhny Novgorod, 603950 Russia*

<sup>b</sup> *Lobachevsky State University, Nizhny Novgorod, 603950 Russia*

<sup>c</sup> *Institute of Physical and Organic Chemistry at Southern Federal University, Stachka Avenue 194/2, 344090, Rostov-on-Don, Russia*

|                                                         |    |
|---------------------------------------------------------|----|
| EPR spectrum of <b>6</b> .....                          | 1  |
| Molecular structure of <b>5</b> .....                   | 2  |
| NMR spectra.....                                        | 2  |
| Crystallographic data.....                              | 8  |
| Quantum chemical calculations.....                      | 10 |
| Cartesian coordinates of the calculated structures..... | 11 |

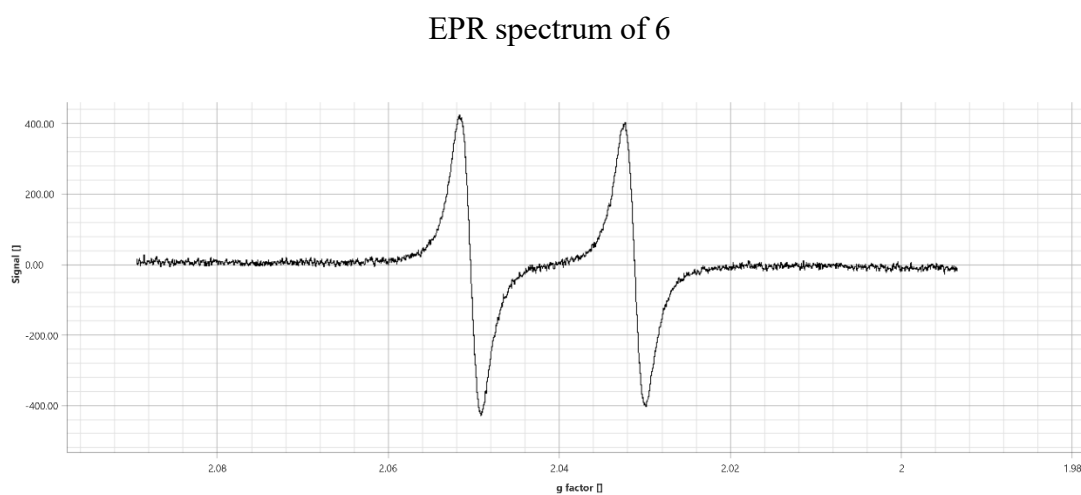

Figure S1. EPR spectrum of **6** in toluene at 293 K.  $g=2.042$ ,  $a(^{31}\text{P}) = 3.31$  mT.

Molecular structure of **5**

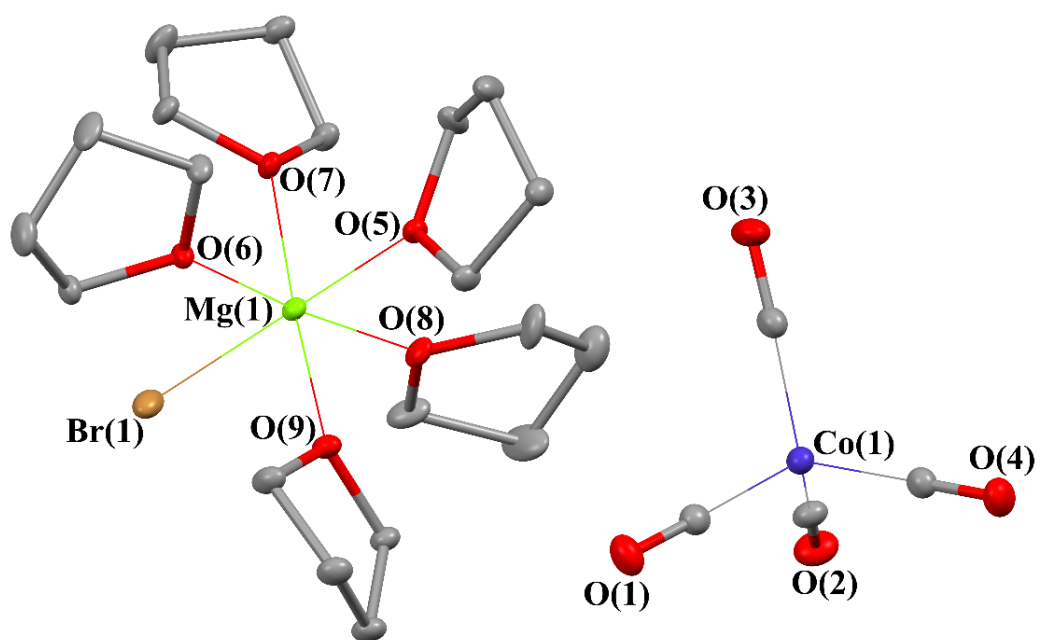

Figure S2. Molecular structure of  $\text{Mg}(\text{THF})_5\text{Br}[\text{Co}(\text{CO})_4]$

NMR spectra

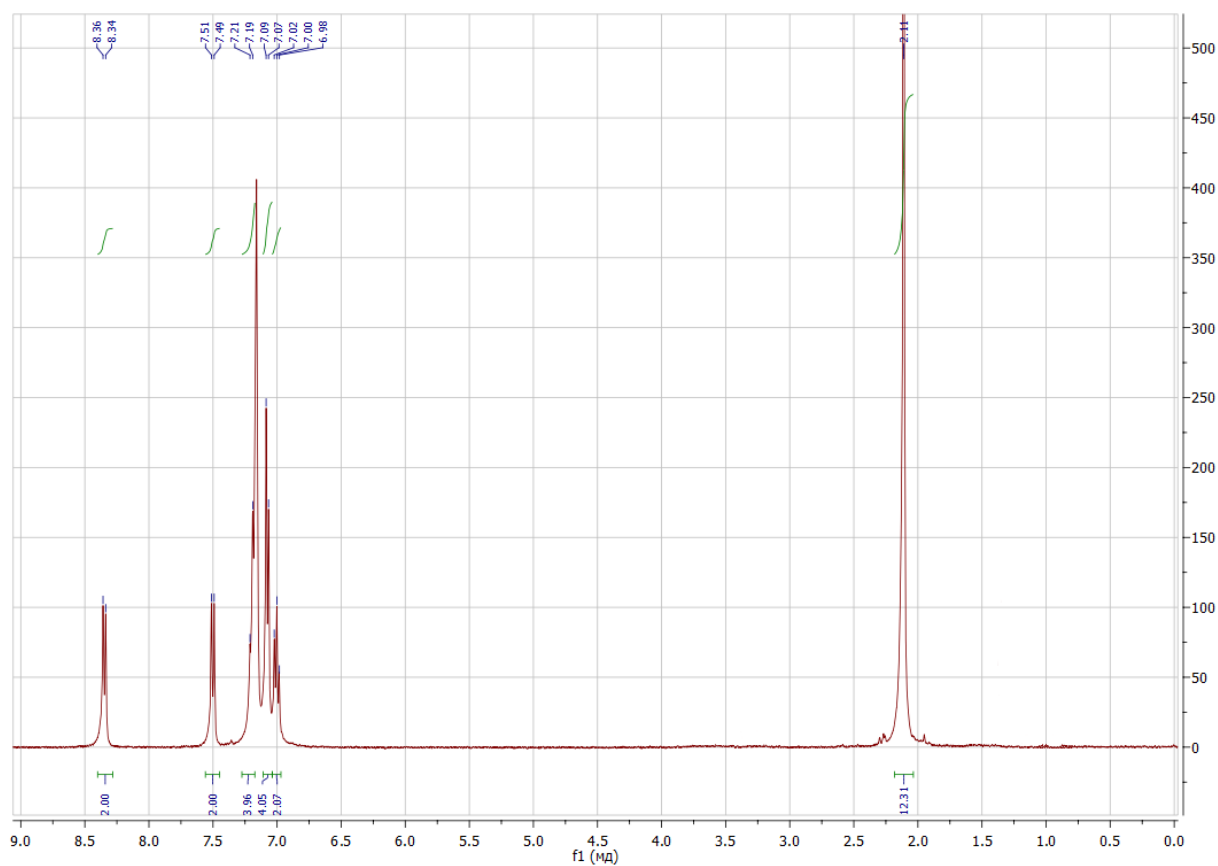

$^1\text{H}$  NMR of **3**

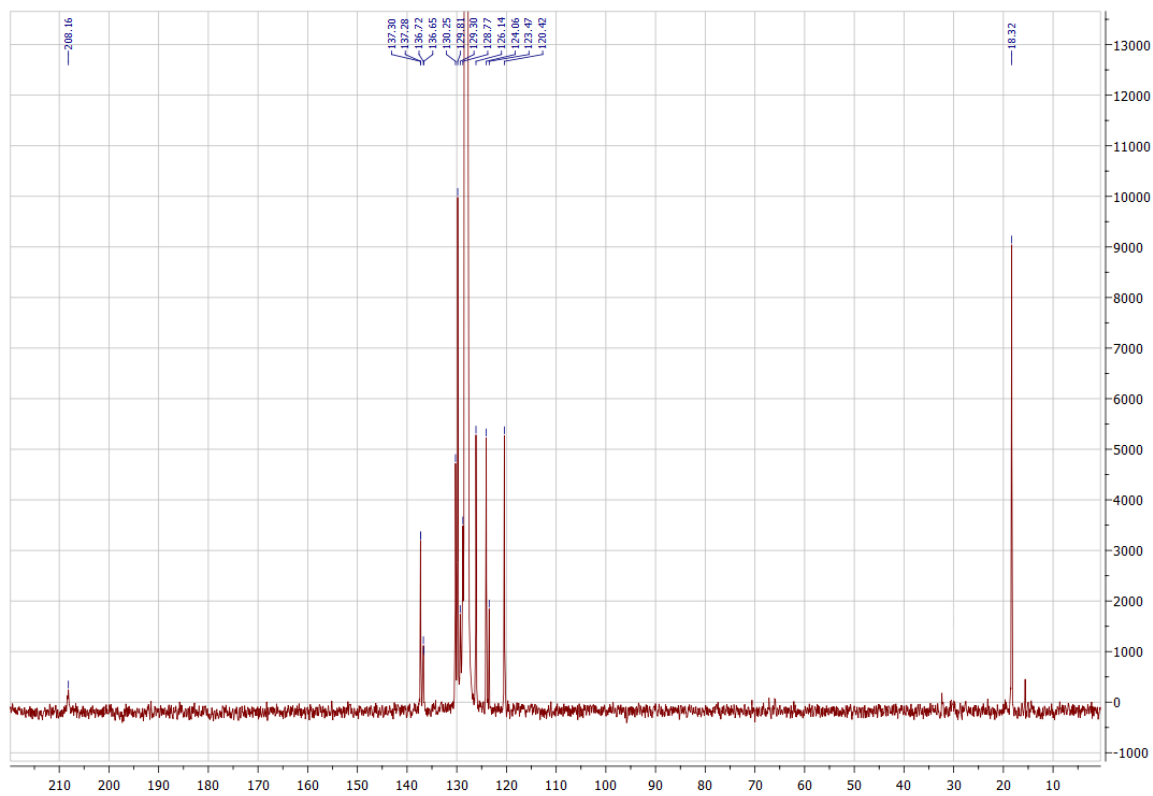

$^{13}\text{C}$  NMR of **3**

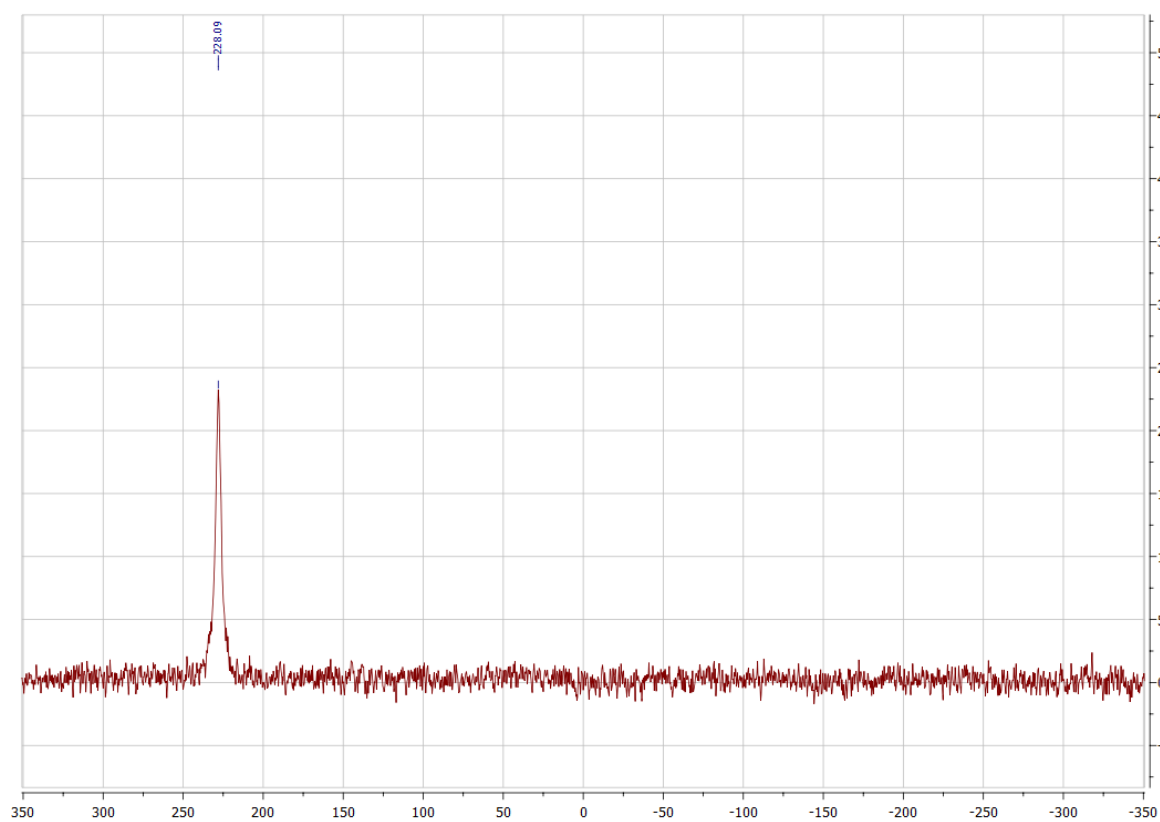

$^{31}\text{P}$  NMR of **3**

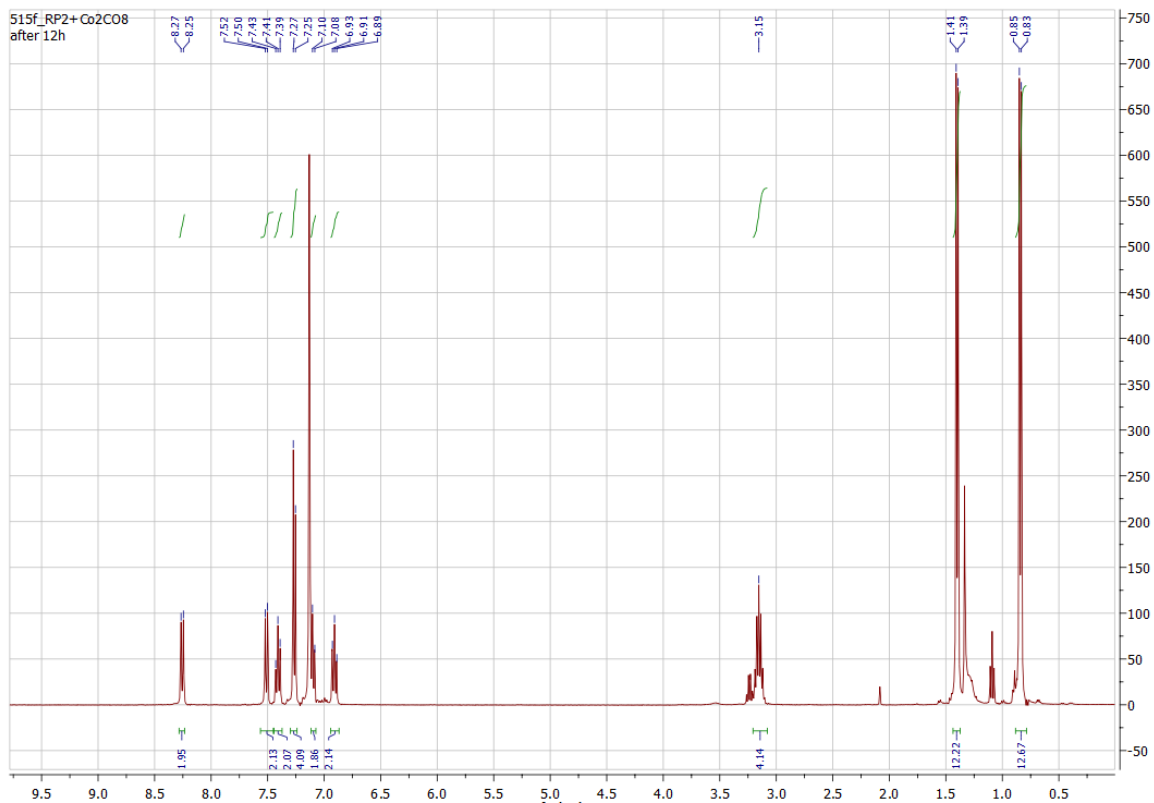

$^1\text{H}$  NMR of **4**

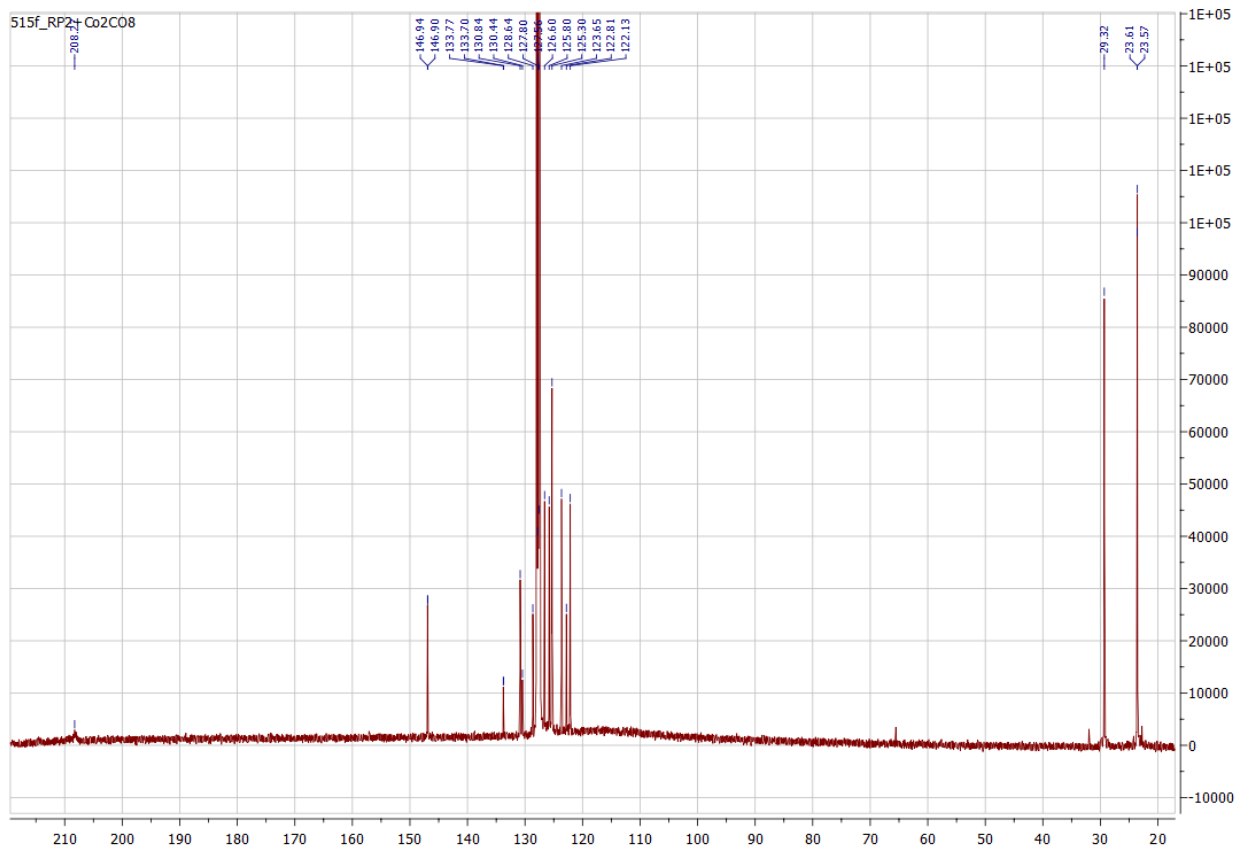

$^{13}\text{C}$  NMR of **4**

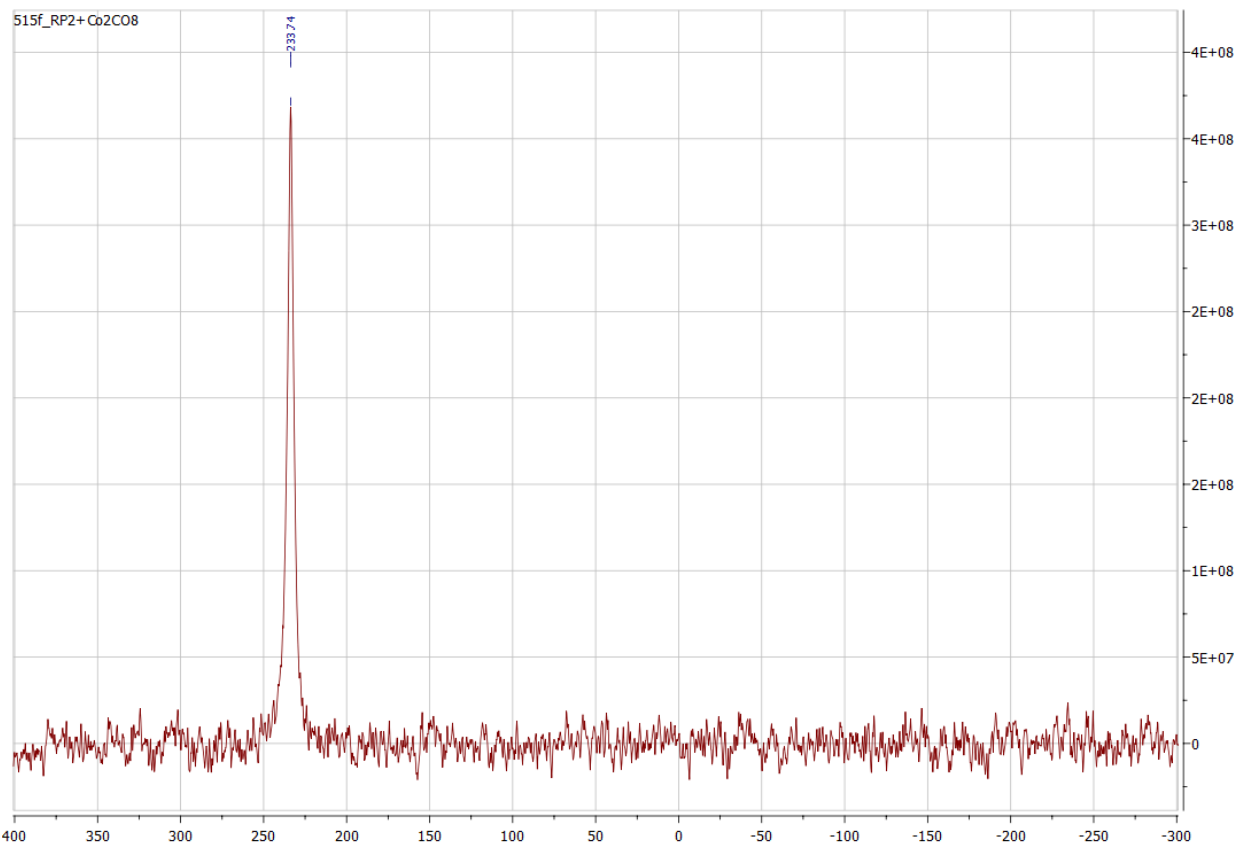

$^{31}\text{P}$  NMR of 4

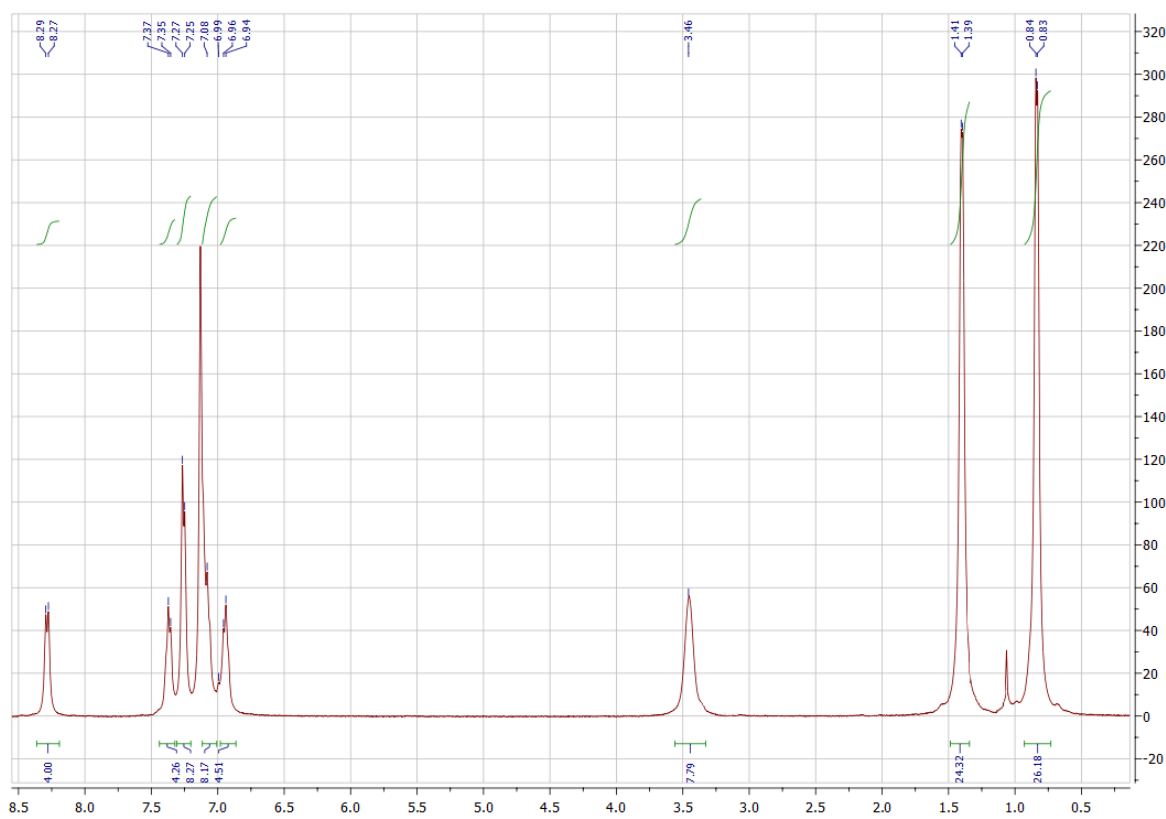

$^1\text{H}$  NMR of 6

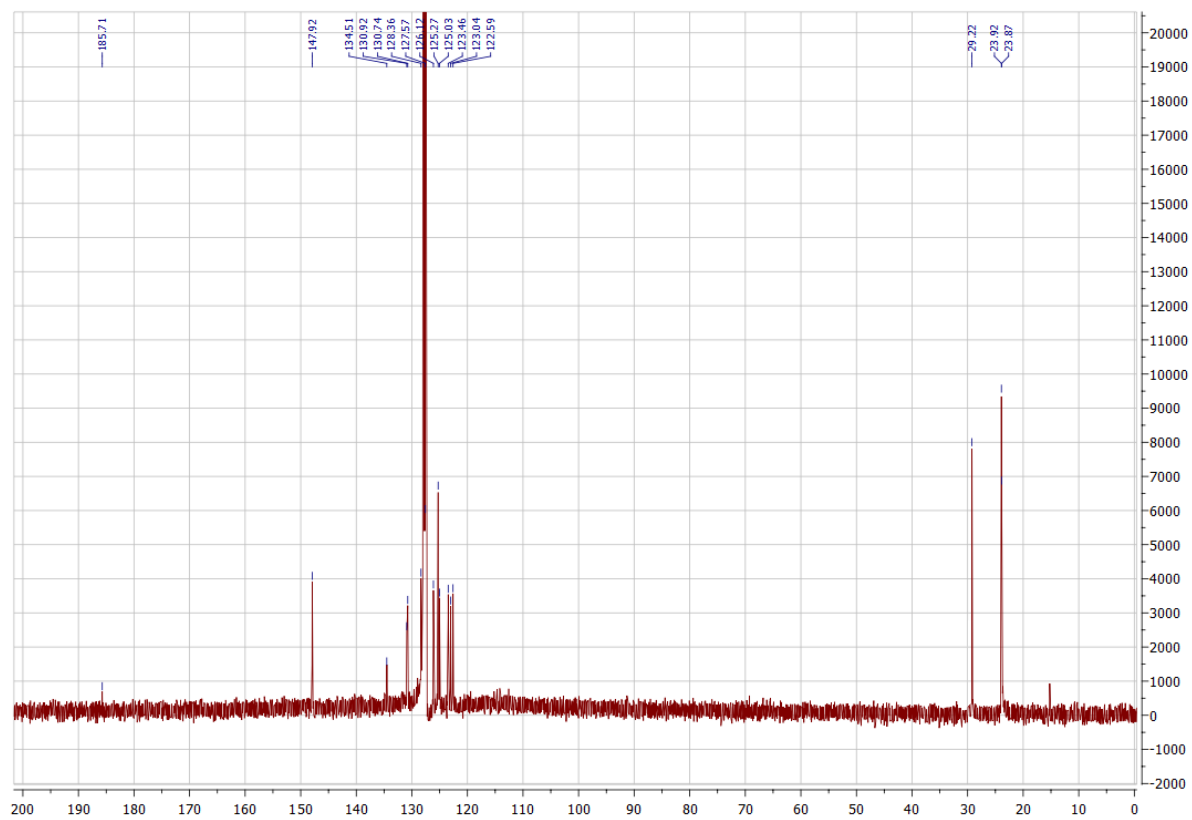

$^{13}\text{C}$  NMR of **6**

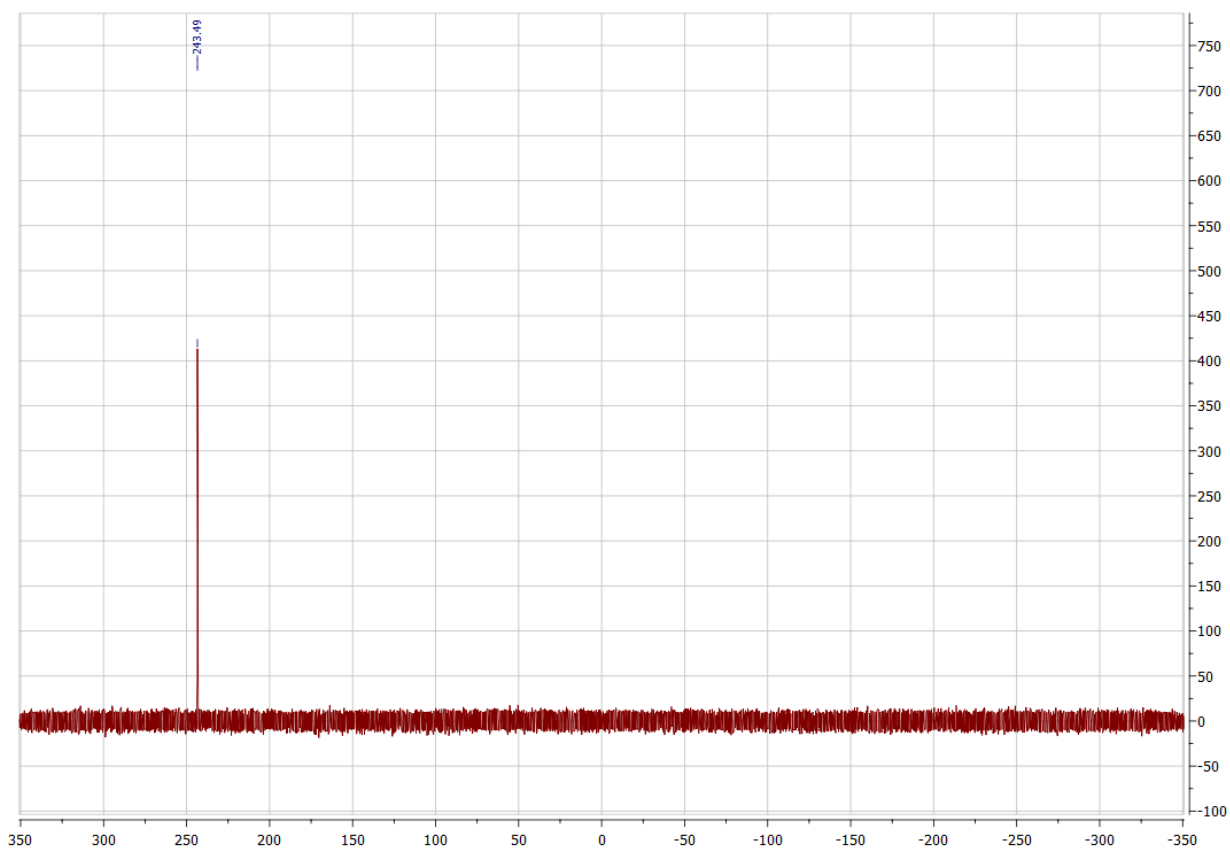

$^{31}\text{P}$  NMR of **6**

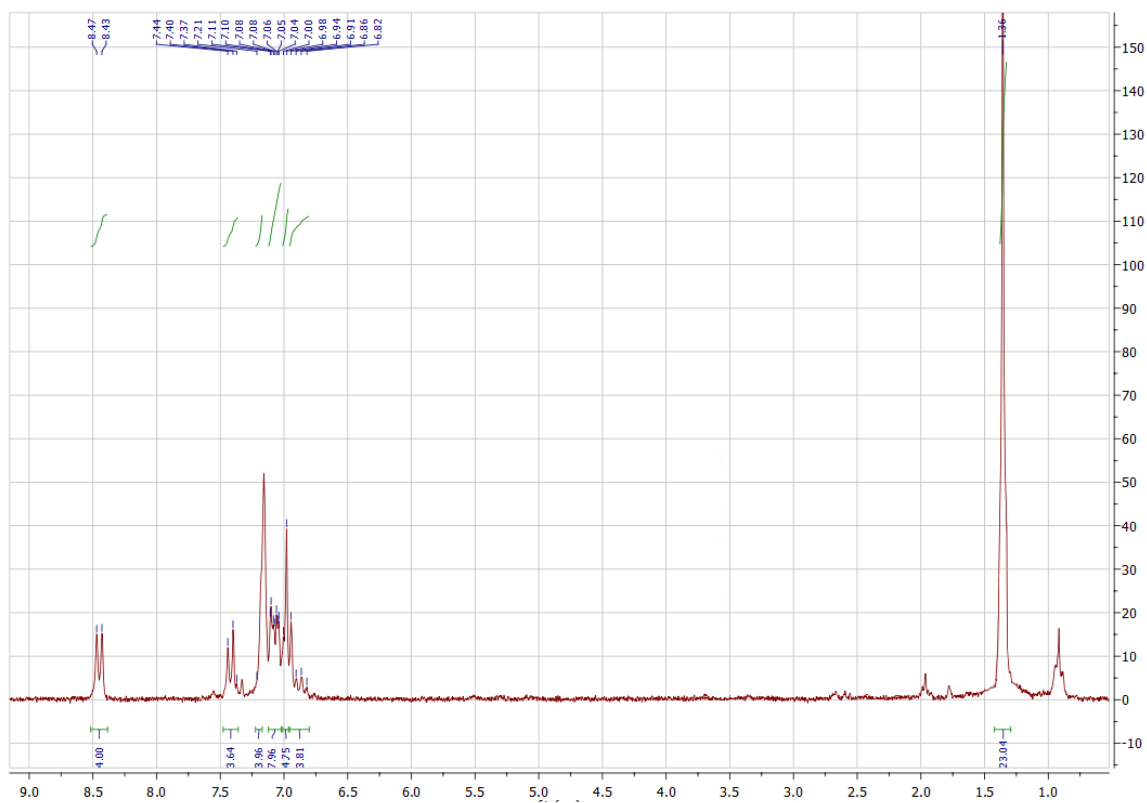

$^1\text{H}$  NMR of 7

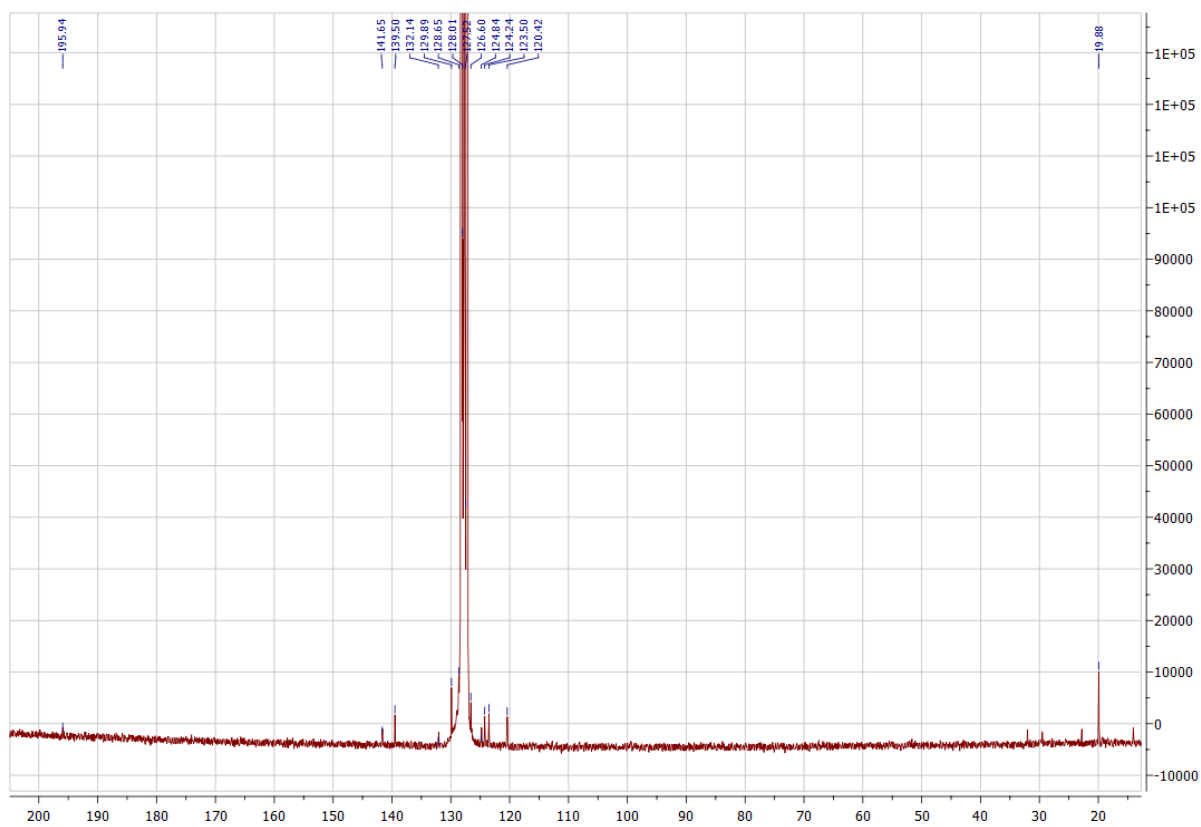

$^{13}\text{C}$  NMR of 7

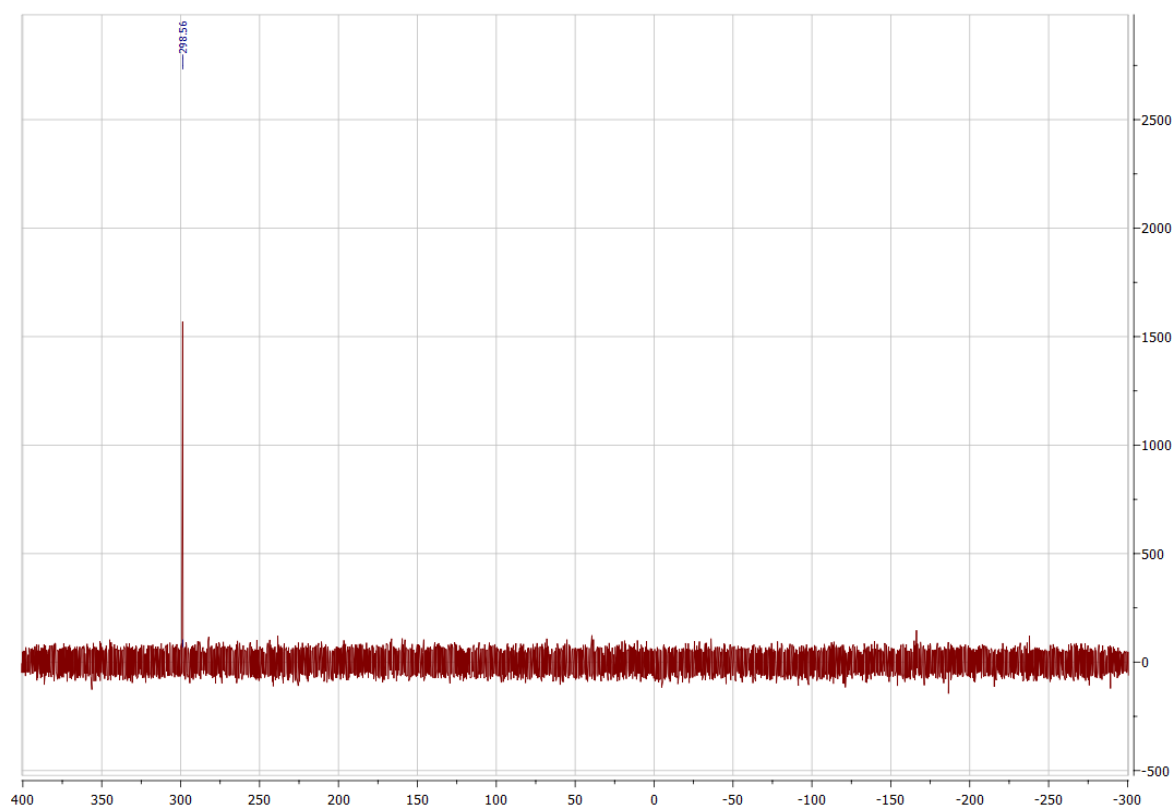

$^{31}\text{P}$  NMR of **7**

### Crystallographic data

Table S1. The selected bond lengths (Å) and angles (°) in the compounds **4**, **6** and **7**.

| Bonds, Å                           | <b>4</b> (M = Co)       | <b>6</b> (M = Fe)      | <b>7</b> (M = Ni)       |
|------------------------------------|-------------------------|------------------------|-------------------------|
| M(1)-P(1)                          | 1.9962(4)               | 2.0370(8)              | 2.1477(3)               |
| P(1)-N(1)                          | 1.6729(12)              | 1.693(2)               | 1.7182(9)               |
| P(1)-N(2)                          | 1.6686(12)              | 1.689(2)               | 1.7164(9)               |
| N(1)-C(1)                          | 1.4034(17)              | 1.415(3)               | 1.4089(13)              |
| N(2)-C(2)                          | 1.4035(18)              | 1.408(3)               | 1.4155(13)              |
| C(1)-C(2)                          | 1.3818(19)              | 1.376(4)               | 1.3760(14)              |
| M(1)-C <sub>CO</sub>               | 1.7767(16) ÷ 1.7823(18) | 1.768(3) ÷ 1.810(3)    | 1.7866(12) ÷ 1.8068(12) |
| M(1)-P(1A)                         |                         |                        | 2.2171(3)               |
| M···M                              |                         | 2.7166(5)              | 2.5263(3)               |
| M(2)-P(2)                          |                         | 2.0298(8)              |                         |
| P(2)-N(3)                          |                         | 1.693(2)               |                         |
| P(2)-N(4)                          |                         | 1.693(2)               |                         |
| N(3)-C(39)                         |                         | 1.405(3)               |                         |
| N(4)-C(40)                         |                         | 1.412(3)               |                         |
| C(39)-C(40)                        |                         | 1.383(3)               |                         |
| M(2)-C <sub>CO</sub>               |                         | 1.779(3) ÷ 1.808(3)    |                         |
| C≡O                                | 1.142(2) ÷ 1.146(2)     | 1.148(3) ÷ 1.156(3)    | 1.1407(15), 1.1408(15)  |
| Angles, °                          | <b>4</b> (M = Co)       | <b>6</b> (M = Fe)      | <b>7</b> (M = Ni)       |
| C <sub>CO</sub> -M-C <sub>CO</sub> | 104.55(8) ÷ 117.16(7)   | 92.15(13) ÷ 153.34(12) | 104.98(6)               |
| N(1)-P(1)-N(2)                     | 89.89(6)                | 89.26(11)              | 90.44(4)                |
| N(1)-P(1)-M(1)                     | 134.27(5)               | 135.68(8)              | 133.22(3)               |
| N(2)-P(1)-M(1)                     | 135.74(4)               | 131.58(8)              | 122.28(3)               |
| M(1)-P(1)-M(1A)                    |                         |                        | 70.711(10)              |



|                 |                         |                     |                        |
|-----------------|-------------------------|---------------------|------------------------|
| N(1)-P(1)-M(1A) |                         |                     | 119.87(3)              |
| N(2)-P(1)-M(1A) |                         |                     | 124.65(3)              |
| N(3)-P(2)-N(4)  |                         | 89.00(10)           |                        |
| N(3)-P(2)-M(2)  |                         | 134.57(8)           |                        |
| N(4)-P(2)-M(2)  |                         | 134.50(8)           |                        |
| M-C≡O           | 177.12(15) ÷ 177.88(18) | 174.0(3) ÷ 179.2(3) | 168.50(11), 171.67(12) |

Table S2. Crystallographic data and structure refinement details for compounds 4-7.

| Compound                                                     | 4                                                                 | 5                                                                 | 6                                                                                            | 7                                                                                            |
|--------------------------------------------------------------|-------------------------------------------------------------------|-------------------------------------------------------------------|----------------------------------------------------------------------------------------------|----------------------------------------------------------------------------------------------|
| Empirical formula                                            | C <sub>41</sub> H <sub>42</sub> CoN <sub>2</sub> O <sub>3</sub> P | C <sub>28</sub> H <sub>48</sub> BrCoMgO <sub>10</sub>             | C <sub>86</sub> H <sub>94</sub> Fe <sub>2</sub> N <sub>4</sub> O <sub>7</sub> P <sub>2</sub> | C <sub>80</sub> H <sub>84</sub> N <sub>4</sub> Ni <sub>2</sub> O <sub>8</sub> P <sub>2</sub> |
| Formula weight                                               | 700.66                                                            | 707.81                                                            | 1469.29                                                                                      | 1408.87                                                                                      |
| Temperature [K]                                              | 100(2)                                                            | 100(2)                                                            | 100(2)                                                                                       | 100(2)                                                                                       |
| Crystal system                                               | Monoclinic                                                        | Monoclinic                                                        | Triclinic                                                                                    | Triclinic                                                                                    |
| Space group                                                  | <i>P</i> 2 <sub>1</sub> / <i>c</i>                                | <i>Cc</i>                                                         | <i>P</i> -1                                                                                  | <i>P</i> -1                                                                                  |
| Unit cell dimensions                                         |                                                                   |                                                                   |                                                                                              |                                                                                              |
| <i>a</i> [Å]                                                 | 14.1235(2)                                                        | 12.9480(2)                                                        | 14.9695(3)                                                                                   | 11.8356(3)                                                                                   |
| <i>b</i> [Å]                                                 | 12.3282(2)                                                        | 23.6942(3)                                                        | 16.1526(3)                                                                                   | 12.3643(4)                                                                                   |
| <i>c</i> [Å]                                                 | 21.0680(3)                                                        | 10.69920(10)                                                      | 17.9588(3)                                                                                   | 13.0056(4)                                                                                   |
| $\alpha$ [°]                                                 | 90                                                                | 90                                                                | 78.315(2)                                                                                    | 104.9470(10)                                                                                 |
| $\beta$ [°]                                                  | 91.3690(10)                                                       | 93.5980(10)                                                       | 73.465(2)                                                                                    | 96.6470(10)                                                                                  |
| $\gamma$ [°]                                                 | 90                                                                | 90                                                                | 68.266(2)                                                                                    | 108.7910(10)                                                                                 |
| <i>V</i> [Å <sup>3</sup> ]                                   | 3667.26(9)                                                        | 3275.96(7)                                                        | 3843.80(14)                                                                                  | 1699.19(9)                                                                                   |
| <i>Z</i>                                                     | 4                                                                 | 4                                                                 | 2                                                                                            | 1                                                                                            |
| <i>d</i> <sub>calc</sub> [g cm <sup>-3</sup> ]               | 1.269                                                             | 1.435                                                             | 1.269                                                                                        | 1.377                                                                                        |
| $\mu$ [mm <sup>-1</sup> ]                                    | 0.551                                                             | 1.813                                                             | 0.476                                                                                        | 0.663                                                                                        |
| <i>F</i> <sub>000</sub>                                      | 1472                                                              | 1480                                                              | 1552                                                                                         | 742                                                                                          |
| Crystal dimensions [mm <sup>3</sup> ]                        | 0.38 × 0.33 × 0.11                                                | 0.78 × 0.53 × 0.32                                                | 0.35 × 0.25 × 0.24                                                                           | 0.34 × 0.28 × 0.14                                                                           |
| $\theta$ range for data collection [°]                       | 2.902–28.698                                                      | 3.023–30.033                                                      | 2.858–26.022                                                                                 | 2.552–35.631                                                                                 |
| Reflections collected                                        | 52679                                                             | 46071                                                             | 58766                                                                                        | 35302                                                                                        |
| Independent reflections ( <i>R</i> <sub>int</sub> )          | 9476 ( <i>R</i> <sub>int</sub> = 0.0426)                          | 9565 ( <i>R</i> <sub>int</sub> = 0.0339)                          | 15135 ( <i>R</i> <sub>int</sub> = 0.0621)                                                    | 15580 ( <i>R</i> <sub>int</sub> = 0.0271)                                                    |
| Completeness to $\theta$ [%]                                 | 99.8                                                              | 99.8                                                              | 99.8                                                                                         | 99.9                                                                                         |
| Data/restraints/parameters                                   | 9476 / 0 / 441                                                    | 9565 / 2 / 371                                                    | 15135 / 1 / 933                                                                              | 15580 / 12 / 456                                                                             |
| Final <i>R</i> indices [ <i>I</i> > 2 $\sigma$ ( <i>I</i> )] | <i>R</i> <sub>1</sub> = 0.0347<br><i>wR</i> <sub>2</sub> = 0.0801 | <i>R</i> <sub>1</sub> = 0.0378<br><i>wR</i> <sub>2</sub> = 0.0960 | <i>R</i> <sub>1</sub> = 0.0484<br><i>wR</i> <sub>2</sub> = 0.1052                            | <i>R</i> <sub>1</sub> = 0.0396<br><i>wR</i> <sub>2</sub> = 0.0904                            |
| Final <i>R</i> indices (all data)                            | <i>R</i> <sub>1</sub> = 0.0500<br><i>wR</i> <sub>2</sub> = 0.0855 | <i>R</i> <sub>1</sub> = 0.0394<br><i>wR</i> <sub>2</sub> = 0.0974 | <i>R</i> <sub>1</sub> = 0.0805<br><i>wR</i> <sub>2</sub> = 0.1170                            | <i>R</i> <sub>1</sub> = 0.0568<br><i>wR</i> <sub>2</sub> = 0.0970                            |
| <i>S</i> ( <i>F</i> <sup>2</sup> )                           | 1.020                                                             | 1.028                                                             | 1.021                                                                                        | 1.039                                                                                        |
| Absolute structure parameter                                 | -                                                                 | 0.496(8)                                                          | -                                                                                            | -                                                                                            |
| Largest diff. peak and hole [e Å <sup>-3</sup> ]             | 0.388 / -0.329                                                    | 1.159 / -0.505                                                    | 0.690 / -0.490                                                                               | 0.733 / -0.399                                                                               |

Quantum chemical calculations

Table S3. Total energies ( $E_{\text{total}}$ , a.u.) of the structures calculated by the DFT wB97XD/6-311++G(d,p) method.

| Structure   | $E_{\text{total}}$ |
|-------------|--------------------|
| <b>4</b>    | -3332.458696       |
| <b>a-Fe</b> | -3213.371779       |
| <b>a-Ni</b> | -3457.993501       |
| <b>b-Co</b> | -6664.932829       |
| <b>6</b>    | -6426.807099       |
| <b>b-Ni</b> | -3457.993501       |
| <b>c-Co</b> | -6438.284555       |
| <b>c-Fe</b> | -6200.142512       |
| <b>7</b>    | -6689.391159       |

Table S4. Fuzzy bond order calculated by the DFT wB97XD/6-311++G(d,p) method

| Compound  | M–P  | N–P  | M–M  |
|-----------|------|------|------|
| <b>4m</b> | 1.77 | 1.32 | –    |
| <b>6m</b> | 1.74 | 1.30 | 0.71 |
| <b>7m</b> | 1.04 | 1.23 | 0.56 |

Table S5. Calculated bond lengths (Å) and angles (°) in the compounds **4m**, **6m** and **7m**.

| Bonds, Å             | <b>4m</b> (M = Co) | <b>6m</b> (M = Fe) | <b>7m</b> (M = Ni) |
|----------------------|--------------------|--------------------|--------------------|
| M(1)-P(1)            | 1.9835             | 2.0090             | 2.2214             |
| P(1)-N(1)            | 1.6820             | 1.6890             | 1.7247             |
| P(1)-N(2)            | 1.6826             | 1.6894             | 1.7209             |
| N(1)-C(1)            | 1.3995             | 1.4036             | 1.4029             |
| N(2)-C(2)            | 1.3999             | 1.4013             | 1.4150             |
| C(1)-C(2)            | 1.3757             | 1.3746             | 1.3669             |
| M(1)-C <sub>CO</sub> | 1.7786 ÷ 1.7929    | 1.7591 ÷ 1.8029    | 1.7992 ÷ 1.8159    |
| M(1)-P(1A)           |                    |                    | 2.1602             |
| M···M                |                    | 2.6820             | 2.5588             |
| M(2)-P(2)            |                    | 2.0092             |                    |
| P(2)-N(3)            |                    | 1.6892             |                    |
| P(2)-N(4)            |                    | 1.6895             |                    |
| N(3)-C(39)           |                    | 1.4037             |                    |
| N(4)-C(40)           |                    | 1.4012             |                    |
| C(39)-C(40)          |                    | 1.3745             |                    |

|                                    |                    |                    |                      |
|------------------------------------|--------------------|--------------------|----------------------|
| M(2)-C <sub>CO</sub>               |                    | 1.7588 ÷ 1.8030    |                      |
| C≡O                                | 1.141 ÷ 1.145      | 1.1455 ÷ 1.1508    | 1.1381, 1.1404       |
| Angles, °                          | <b>4m</b> (M = Co) | <b>6m</b> (M = Fe) | <b>7m</b> (M = Ni)   |
| C <sub>CO</sub> -M-C <sub>CO</sub> | 106.15 ÷ 112.61    | 93.19 ÷ 152.36     | 105.54, 105.57       |
| N(1)-P(1)-N(2)                     | 89.12              | 89.05              | 90.37                |
| N(1)-P(1)-M(1)                     | 134.28             | 134.89             | 120.72               |
| N(2)-P(1)-M(1)                     | 135.57             | 133.21             | 124.11               |
| M(1)-P(1)-M(1A)                    |                    |                    | 71.45                |
| N(1)-P(1)-M(1A)                    |                    |                    | 131.09               |
| N(2)-P(1)-M(1A)                    |                    |                    | 123.45               |
| N(3)-P(2)-N(4)                     |                    | 89.05              |                      |
| N(3)-P(2)-M(2)                     |                    | 134.90             |                      |
| N(4)-P(2)-M(2)                     |                    | 133.26             |                      |
| M-C≡O                              | 178.74 ÷ 179.77    | 174.25 ÷ 177.03    | 167.49(1), 171.65(1) |

### Cartesian coordinates of the calculated structures

66

a-Fe

|    |              |              |              |
|----|--------------|--------------|--------------|
| 26 | -3.149116000 | 0.042399000  | -0.059250000 |
| 15 | -1.121900000 | 0.015079000  | -0.009453000 |
| 7  | 0.061218000  | -1.189371000 | 0.070463000  |
| 7  | 0.093216000  | 1.187386000  | 0.072759000  |
| 6  | 1.376071000  | -0.705612000 | 0.133293000  |
| 6  | 1.394518000  | 0.668086000  | 0.134663000  |
| 6  | 2.626624000  | 1.412069000  | 0.200787000  |
| 6  | 2.685109000  | 2.821463000  | 0.292495000  |
| 1  | 1.776868000  | 3.399785000  | 0.347171000  |
| 6  | 3.886891000  | 3.486298000  | 0.319832000  |
| 1  | 3.899183000  | 4.567693000  | 0.393227000  |
| 6  | 5.085026000  | 2.768306000  | 0.257429000  |
| 1  | 6.036821000  | 3.286666000  | 0.270947000  |
| 6  | 5.051953000  | 1.396084000  | 0.193573000  |
| 1  | 5.994158000  | 0.866671000  | 0.163706000  |
| 6  | 3.839173000  | 0.676952000  | 0.176125000  |
| 6  | 3.819665000  | -0.780706000 | 0.171885000  |
| 6  | 5.012735000  | -1.532377000 | 0.182607000  |
| 1  | 5.968656000  | -1.028164000 | 0.153636000  |
| 6  | 5.008776000  | -2.905387000 | 0.237863000  |
| 1  | 5.946494000  | -3.448962000 | 0.246019000  |
| 6  | 3.791890000  | -3.591027000 | 0.298292000  |
| 1  | 3.774417000  | -4.672802000 | 0.364677000  |
| 6  | 2.608412000  | -2.893816000 | 0.277248000  |
| 1  | 1.685357000  | -3.448158000 | 0.330098000  |
| 6  | 2.587756000  | -1.482870000 | 0.194372000  |
| 6  | -0.360991000 | -2.547512000 | -0.106855000 |
| 6  | -0.817131000 | -3.260141000 | 1.004953000  |
| 6  | -1.246736000 | -4.569511000 | 0.804329000  |
| 1  | -1.603988000 | -5.145783000 | 1.650903000  |
| 6  | -1.221623000 | -5.138015000 | -0.461226000 |
| 1  | -1.562735000 | -6.157562000 | -0.601234000 |
| 6  | -0.770592000 | -4.405656000 | -1.551011000 |
| 1  | -0.761563000 | -4.854293000 | -2.538391000 |
| 6  | -0.338654000 | -3.092737000 | -1.394168000 |
| 6  | -0.289884000 | 2.556237000  | -0.109103000 |
| 6  | -0.735303000 | 3.282704000  | 0.998353000  |
| 6  | -1.124476000 | 4.603842000  | 0.793057000  |

|   |              |              |              |
|---|--------------|--------------|--------------|
| 1 | -1.472389000 | 5.191109000  | 1.635977000  |
| 6 | -1.070770000 | 5.170750000  | -0.472374000 |
| 1 | -1.378952000 | 6.200256000  | -0.615783000 |
| 6 | -0.631919000 | 4.424744000  | -1.557796000 |
| 1 | -0.600385000 | 4.872251000  | -2.545220000 |
| 6 | -0.240145000 | 3.099784000  | -1.396386000 |
| 6 | -3.481489000 | 1.756804000  | -0.648806000 |
| 8 | -3.741565000 | 2.802721000  | -1.026099000 |
| 6 | -3.853959000 | 0.053925000  | 1.580040000  |
| 8 | -4.229703000 | 0.059622000  | 2.664248000  |
| 6 | -3.530340000 | -1.665102000 | -0.639161000 |
| 8 | -3.820601000 | -2.705826000 | -1.008688000 |
| 6 | -0.822027000 | -2.633806000 | 2.371832000  |
| 1 | -1.064955000 | -3.374318000 | 3.134869000  |
| 1 | 0.152238000  | -2.197986000 | 2.608870000  |
| 1 | -1.563053000 | -1.831098000 | 2.428790000  |
| 6 | 0.150408000  | -2.280052000 | -2.560202000 |
| 1 | 1.193961000  | -1.981645000 | -2.422797000 |
| 1 | 0.076274000  | -2.849004000 | -3.487741000 |
| 1 | -0.439699000 | -1.365461000 | -2.672652000 |
| 6 | -0.770607000 | 2.658639000  | 2.365809000  |
| 1 | -1.535194000 | 1.878130000  | 2.417524000  |
| 1 | 0.188423000  | 2.194567000  | 2.611412000  |
| 1 | -0.997498000 | 3.407090000  | 3.126078000  |
| 6 | 0.240082000  | 2.273760000  | -2.556650000 |
| 1 | 0.152651000  | 2.829361000  | -3.491041000 |
| 1 | 1.287340000  | 1.984885000  | -2.425373000 |
| 1 | -0.343654000 | 1.353268000  | -2.650211000 |

66

4

|    |              |              |              |
|----|--------------|--------------|--------------|
| 27 | -3.062057000 | -0.085072000 | 0.026203000  |
| 15 | -1.079646000 | -0.034253000 | 0.068988000  |
| 7  | 0.084983000  | 1.179348000  | 0.078251000  |
| 7  | 0.152158000  | -1.180422000 | 0.056065000  |
| 6  | 1.408325000  | 0.724218000  | 0.066616000  |
| 6  | 1.448023000  | -0.650807000 | 0.050221000  |
| 6  | 2.693908000  | -1.377061000 | 0.019613000  |
| 6  | 2.777652000  | -2.787349000 | 0.007556000  |
| 1  | 1.881035000  | -3.385023000 | 0.034227000  |
| 6  | 3.991072000  | -3.430520000 | -0.038972000 |
| 1  | 4.022713000  | -4.513943000 | -0.048119000 |
| 6  | 5.174661000  | -2.688324000 | -0.074968000 |
| 1  | 6.135272000  | -3.188649000 | -0.115008000 |
| 6  | 5.116509000  | -1.315379000 | -0.057939000 |
| 1  | 6.048483000  | -0.768184000 | -0.083931000 |
| 6  | 3.891925000  | -0.619065000 | -0.007812000 |
| 6  | 3.849522000  | 0.839228000  | 0.024745000  |
| 6  | 5.030924000  | 1.608677000  | 0.019272000  |
| 1  | 5.993979000  | 1.119648000  | -0.024111000 |
| 6  | 5.006833000  | 2.981829000  | 0.071447000  |
| 1  | 5.936465000  | 3.539126000  | 0.066457000  |
| 6  | 3.781136000  | 3.649709000  | 0.137471000  |
| 1  | 3.747661000  | 4.731841000  | 0.189307000  |
| 6  | 2.608117000  | 2.934181000  | 0.139285000  |
| 1  | 1.677431000  | 3.475179000  | 0.193766000  |
| 6  | 2.608910000  | 1.522855000  | 0.075786000  |

|   |              |              |              |
|---|--------------|--------------|--------------|
| 6 | -0.381738000 | 2.534805000  | -0.008204000 |
| 6 | -0.541157000 | 3.102926000  | -1.274299000 |
| 6 | -1.025145000 | 4.405806000  | -1.343522000 |
| 1 | -1.156369000 | 4.873015000  | -2.313431000 |
| 6 | -1.346618000 | 5.103726000  | -0.187096000 |
| 1 | -1.730282000 | 6.115335000  | -0.257705000 |
| 6 | -1.187193000 | 4.511396000  | 1.057765000  |
| 1 | -1.446940000 | 5.059329000  | 1.956849000  |
| 6 | -0.702627000 | 3.211194000  | 1.170122000  |
| 6 | -0.234878000 | -2.562639000 | 0.020911000  |
| 6 | -0.432417000 | -3.168205000 | -1.222022000 |
| 6 | -0.831432000 | -4.501429000 | -1.236151000 |
| 1 | -0.988370000 | -4.998148000 | -2.187410000 |
| 6 | -1.034237000 | -5.192736000 | -0.049469000 |
| 1 | -1.350002000 | -6.229535000 | -0.077224000 |
| 6 | -0.842996000 | -4.562478000 | 1.171889000  |
| 1 | -1.013475000 | -5.104646000 | 2.095449000  |
| 6 | -0.443677000 | -3.230371000 | 1.229098000  |
| 6 | -3.624404000 | -1.691572000 | 0.589554000  |
| 8 | -3.982169000 | -2.717924000 | 0.944761000  |
| 6 | -3.672023000 | 0.159380000  | -1.626543000 |
| 8 | -4.041177000 | 0.321996000  | -2.697568000 |
| 6 | -3.724581000 | 1.256763000  | 1.004236000  |
| 8 | -4.133723000 | 2.124730000  | 1.627321000  |
| 6 | -0.180109000 | 2.328493000  | -2.511101000 |
| 1 | -0.341378000 | 2.929950000  | -3.406296000 |
| 1 | 0.868876000  | 2.018378000  | -2.489629000 |
| 1 | -0.788993000 | 1.423498000  | -2.597724000 |
| 6 | -0.511519000 | 2.556729000  | 2.509819000  |
| 1 | 0.504003000  | 2.165108000  | 2.617345000  |
| 1 | -0.694348000 | 3.268700000  | 3.315407000  |
| 1 | -1.203297000 | 1.718539000  | 2.636505000  |
| 6 | -0.205414000 | -2.400558000 | -2.494328000 |
| 1 | -0.940234000 | -1.595745000 | -2.595327000 |
| 1 | 0.788566000  | -1.944812000 | -2.511876000 |
| 1 | -0.298652000 | -3.054272000 | -3.362305000 |
| 6 | -0.236392000 | -2.527123000 | 2.541213000  |
| 1 | -0.334058000 | -3.225984000 | 3.372719000  |
| 1 | 0.753420000  | -2.065090000 | 2.593070000  |
| 1 | -0.978463000 | -1.733558000 | 2.675188000  |

66

a-Ni

|    |              |              |              |
|----|--------------|--------------|--------------|
| 28 | -2.989273000 | -0.458535000 | -0.219813000 |
| 15 | -1.036660000 | -0.222813000 | 0.880181000  |
| 7  | -0.088466000 | 1.189389000  | 0.597827000  |
| 7  | 0.329855000  | -1.192439000 | 0.475505000  |
| 6  | 1.262681000  | 0.897814000  | 0.400317000  |
| 6  | 1.501983000  | -0.455317000 | 0.313035000  |
| 6  | 2.831158000  | -0.966074000 | 0.077589000  |
| 6  | 3.134617000  | -2.344895000 | 0.025934000  |
| 1  | 2.364502000  | -3.076938000 | 0.210918000  |
| 6  | 4.404311000  | -2.787814000 | -0.258756000 |
| 1  | 4.604967000  | -3.852432000 | -0.294348000 |
| 6  | 5.427140000  | -1.866498000 | -0.501941000 |
| 1  | 6.428809000  | -2.208398000 | -0.736018000 |

|   |              |              |              |
|---|--------------|--------------|--------------|
| 6 | 5.161177000  | -0.519788000 | -0.428798000 |
| 1 | 5.973606000  | 0.171422000  | -0.606977000 |
| 6 | 3.875720000  | -0.027046000 | -0.127533000 |
| 6 | 3.624804000  | 1.401974000  | 0.017279000  |
| 6 | 4.655264000  | 2.357068000  | -0.097708000 |
| 1 | 5.660311000  | 2.042663000  | -0.344536000 |
| 6 | 4.429235000  | 3.696870000  | 0.113326000  |
| 1 | 5.244815000  | 4.404539000  | 0.018319000  |
| 6 | 3.151175000  | 4.139384000  | 0.473191000  |
| 1 | 2.971562000  | 5.190039000  | 0.669923000  |
| 6 | 2.120406000  | 3.238120000  | 0.583145000  |
| 1 | 1.141401000  | 3.593979000  | 0.868939000  |
| 6 | 2.324424000  | 1.863731000  | 0.332423000  |
| 6 | -0.753640000 | 2.388032000  | 0.184910000  |
| 6 | -0.722804000 | 2.764644000  | -1.164138000 |
| 6 | -1.420684000 | 3.910228000  | -1.537665000 |
| 1 | -1.411068000 | 4.215085000  | -2.578820000 |
| 6 | -2.137451000 | 4.647621000  | -0.607021000 |
| 1 | -2.682016000 | 5.531578000  | -0.919251000 |
| 6 | -2.160039000 | 4.252083000  | 0.722542000  |
| 1 | -2.719841000 | 4.829785000  | 1.450349000  |
| 6 | -1.466684000 | 3.119933000  | 1.141893000  |
| 6 | 0.131200000  | -2.594486000 | 0.273552000  |
| 6 | -0.012686000 | -3.074978000 | -1.033106000 |
| 6 | -0.236438000 | -4.436887000 | -1.207802000 |
| 1 | -0.349800000 | -4.831819000 | -2.211695000 |
| 6 | -0.325686000 | -5.287813000 | -0.114697000 |
| 1 | -0.508904000 | -6.345386000 | -0.267336000 |
| 6 | -0.179436000 | -4.789729000 | 1.171893000  |
| 1 | -0.240514000 | -5.460739000 | 2.022074000  |
| 6 | 0.055326000  | -3.434209000 | 1.389574000  |
| 6 | -3.330047000 | -2.243662000 | -0.194760000 |
| 8 | -3.557607000 | -3.358550000 | -0.185543000 |
| 6 | -2.878892000 | 0.214085000  | -1.902118000 |
| 8 | -2.843321000 | 0.627291000  | -2.963229000 |
| 6 | -4.154356000 | 0.522136000  | 0.781750000  |
| 8 | -4.877810000 | 1.154856000  | 1.391532000  |
| 6 | 0.048750000  | 1.979494000  | -2.189096000 |
| 1 | -0.327547000 | 2.188723000  | -3.191189000 |
| 1 | 1.111940000  | 2.237585000  | -2.159397000 |
| 1 | -0.027075000 | 0.905191000  | -2.012725000 |
| 6 | -1.468090000 | 2.709844000  | 2.590181000  |
| 1 | -0.457582000 | 2.469598000  | 2.930744000  |
| 1 | -1.867764000 | 3.509944000  | 3.215046000  |
| 1 | -2.081249000 | 1.819041000  | 2.757065000  |
| 6 | 0.099472000  | -2.143343000 | -2.206087000 |
| 1 | -0.643330000 | -1.345885000 | -2.132828000 |
| 1 | 1.086434000  | -1.672671000 | -2.244450000 |
| 1 | -0.061291000 | -2.676467000 | -3.143966000 |
| 6 | 0.272063000  | -2.893585000 | 2.776867000  |
| 1 | 0.284284000  | -3.702820000 | 3.508377000  |
| 1 | 1.223251000  | -2.356845000 | 2.838696000  |
| 1 | -0.512033000 | -2.186663000 | 3.060676000  |

132

6

|    |             |              |              |
|----|-------------|--------------|--------------|
| 26 | 1.155350000 | -1.516627000 | -0.679731000 |
|----|-------------|--------------|--------------|

|    |               |              |              |
|----|---------------|--------------|--------------|
| 26 | -1.154873000  | -1.517436000 | 0.682551000  |
| 15 | 2.799173000   | -0.423495000 | -0.307177000 |
| 15 | -2.798215000  | -0.423609000 | 0.308714000  |
| 7  | 3.460918000   | 0.991360000  | -0.949875000 |
| 7  | 4.305488000   | -0.789623000 | 0.364467000  |
| 7  | -3.461516000  | 0.990009000  | 0.953028000  |
| 7  | -4.304615000  | -0.791180000 | -0.362130000 |
| 6  | 4.820715000   | 1.185969000  | -0.661256000 |
| 6  | 5.308067000   | 0.154504000  | 0.105604000  |
| 6  | 6.675939000   | 0.123952000  | 0.562153000  |
| 6  | 7.212896000   | -0.907275000 | 1.366863000  |
| 1  | 6.597197000   | -1.737333000 | 1.670790000  |
| 6  | 8.521628000   | -0.883107000 | 1.783842000  |
| 1  | 8.900887000   | -1.690039000 | 2.400232000  |
| 6  | 9.354106000   | 0.177205000  | 1.414845000  |
| 1  | 10.387392000  | 0.204031000  | 1.741249000  |
| 6  | 8.854382000   | 1.190727000  | 0.633622000  |
| 1  | 9.520438000   | 1.998731000  | 0.365341000  |
| 6  | 7.517573000   | 1.201169000  | 0.184343000  |
| 6  | 7.006860000   | 2.283676000  | -0.647320000 |
| 6  | 7.836068000   | 3.351347000  | -1.049108000 |
| 1  | 8.869928000   | 3.379178000  | -0.734647000 |
| 6  | 7.376640000   | 4.374656000  | -1.842158000 |
| 1  | 8.044409000   | 5.178074000  | -2.131159000 |
| 6  | 6.047817000   | 4.366830000  | -2.275125000 |
| 1  | 5.671715000   | 5.163302000  | -2.906960000 |
| 6  | 5.208829000   | 3.344775000  | -1.902671000 |
| 1  | 4.191701000   | 3.368204000  | -2.256043000 |
| 6  | 5.656211000   | 2.284237000  | -1.081160000 |
| 6  | 2.586835000   | 1.909221000  | -1.618834000 |
| 6  | 2.382680000   | 1.763369000  | -2.992846000 |
| 6  | 1.537701000   | 2.671253000  | -3.623660000 |
| 1  | 1.360066000   | 2.579154000  | -4.689517000 |
| 6  | 0.923772000   | 3.685364000  | -2.902419000 |
| 1  | 0.270292000   | 4.387490000  | -3.408445000 |
| 6  | 1.142971000   | 3.806472000  | -1.537285000 |
| 1  | 0.670428000   | 4.609340000  | -0.982493000 |
| 6  | 1.973536000   | 2.914275000  | -0.865836000 |
| 6  | 4.436899000   | -2.018025000 | 1.091531000  |
| 6  | 4.825730000   | -3.166814000 | 0.397711000  |
| 6  | 4.933568000   | -4.352553000 | 1.117711000  |
| 1  | 5.233477000   | -5.259929000 | 0.604811000  |
| 6  | 4.655563000   | -4.383063000 | 2.477331000  |
| 1  | 4.736285000   | -5.316594000 | 3.022728000  |
| 6  | 4.268556000   | -3.227765000 | 3.141664000  |
| 1  | 4.050249000   | -3.260305000 | 4.203519000  |
| 6  | 4.149151000   | -2.021202000 | 2.458408000  |
| 6  | -4.821465000  | 1.183530000  | 0.664193000  |
| 6  | -5.307884000  | 0.152206000  | -0.103343000 |
| 6  | -6.675416000  | 0.121366000  | -0.561004000 |
| 6  | -7.211233000  | -0.909291000 | -1.367186000 |
| 1  | -6.595265000  | -1.739335000 | -1.670558000 |
| 6  | -8.519236000  | -0.884572000 | -1.786421000 |
| 1  | -8.897552000  | -1.690970000 | -2.404089000 |
| 6  | -9.352073000  | 0.175774000  | -1.418367000 |
| 1  | -10.384723000 | 0.203129000  | -1.746731000 |
| 6  | -8.853565000  | 1.188549000  | -0.635399000 |

|   |              |              |              |
|---|--------------|--------------|--------------|
| 1 | -9.519858000 | 1.996627000  | -0.367957000 |
| 6 | -7.517631000 | 1.198251000  | -0.183502000 |
| 6 | -7.008489000 | 2.279457000  | 0.650882000  |
| 6 | -7.839032000 | 3.345334000  | 1.054706000  |
| 1 | -8.872625000 | 3.373036000  | 0.739369000  |
| 6 | -7.381386000 | 4.366719000  | 1.851257000  |
| 1 | -8.050118000 | 5.168821000  | 2.141676000  |
| 6 | -6.053207000 | 4.358430000  | 2.286225000  |
| 1 | -5.678651000 | 5.153017000  | 2.921337000  |
| 6 | -5.212969000 | 3.338118000  | 1.911843000  |
| 1 | -4.196502000 | 3.360932000  | 2.267172000  |
| 6 | -5.658357000 | 2.279930000  | 1.086246000  |
| 6 | -2.587329000 | 1.913597000  | 1.614021000  |
| 6 | -1.984189000 | 2.920373000  | 0.854796000  |
| 6 | -1.155526000 | 3.819436000  | 1.519112000  |
| 1 | -0.691548000 | 4.624029000  | 0.959582000  |
| 6 | -0.927345000 | 3.703182000  | 2.883311000  |
| 1 | -0.275417000 | 4.410791000  | 3.383670000  |
| 6 | -1.530524000 | 2.687127000  | 3.610571000  |
| 1 | -1.346364000 | 2.598867000  | 4.675641000  |
| 6 | -2.374267000 | 1.772814000  | 2.987070000  |
| 6 | -4.434995000 | -2.018583000 | -1.091053000 |
| 6 | -4.145713000 | -2.020043000 | -2.457617000 |
| 6 | -4.264043000 | -3.225820000 | -3.142435000 |
| 1 | -4.044470000 | -3.257065000 | -4.204069000 |
| 6 | -4.651830000 | -4.381956000 | -2.479987000 |
| 1 | -4.731881000 | -5.314799000 | -3.026657000 |
| 6 | -4.931480000 | -4.353130000 | -1.120674000 |
| 1 | -5.232104000 | -5.261111000 | -0.609267000 |
| 6 | -4.824450000 | -3.168268000 | -0.399089000 |
| 6 | 1.366587000  | -2.868875000 | 0.493855000  |
| 8 | 1.508659000  | -3.766323000 | 1.191561000  |
| 6 | 1.427415000  | -2.540523000 | -2.084051000 |
| 8 | 1.657226000  | -3.181171000 | -3.008273000 |
| 6 | 0.147002000  | -0.353086000 | -1.596045000 |
| 8 | -0.443770000 | 0.360718000  | -2.278477000 |
| 6 | -0.145573000 | -0.355115000 | 1.599209000  |
| 8 | 0.446284000  | 0.357031000  | 2.282514000  |
| 6 | -1.366819000 | -2.870699000 | -0.489914000 |
| 8 | -1.508379000 | -3.768705000 | -1.186908000 |
| 6 | -1.429679000 | -2.538288000 | 2.088167000  |
| 8 | -1.660784000 | -3.176448000 | 3.013848000  |
| 6 | 3.081178000  | 0.676171000  | -3.759915000 |
| 1 | 4.164489000  | 0.729950000  | -3.617696000 |
| 1 | 2.756386000  | -0.312028000 | -3.422971000 |
| 1 | 2.869511000  | 0.758079000  | -4.826682000 |
| 6 | 2.235948000  | 3.038340000  | 0.608936000  |
| 1 | 1.799960000  | 2.198686000  | 1.158061000  |
| 1 | 3.308880000  | 3.053433000  | 0.819305000  |
| 1 | 1.796838000  | 3.955405000  | 1.002489000  |
| 6 | 5.151009000  | -3.102769000 | -1.068382000 |
| 1 | 5.969164000  | -2.400855000 | -1.256841000 |
| 1 | 5.448514000  | -4.083376000 | -1.441672000 |
| 1 | 4.289258000  | -2.765431000 | -1.650142000 |
| 6 | 3.754507000  | -0.753190000 | 3.162465000  |
| 1 | 2.802557000  | -0.368958000 | 2.786600000  |
| 1 | 3.648195000  | -0.925088000 | 4.234374000  |



|   |              |              |              |
|---|--------------|--------------|--------------|
| 1 | 4.505873000  | 0.027782000  | 3.012245000  |
| 6 | -3.750384000 | -0.751177000 | -3.159756000 |
| 1 | -2.798135000 | -0.368174000 | -2.783352000 |
| 1 | -3.644243000 | -0.921510000 | -4.231934000 |
| 1 | -4.501144000 | 0.030102000  | -3.008318000 |
| 6 | -5.151064000 | -3.106052000 | 1.066779000  |
| 1 | -5.448073000 | -4.087298000 | 1.438788000  |
| 1 | -4.290041000 | -2.768595000 | 1.649541000  |
| 1 | -5.969894000 | -2.404980000 | 1.255386000  |
| 6 | -3.062052000 | 0.684123000  | 3.761635000  |
| 1 | -4.145956000 | 0.727046000  | 3.620891000  |
| 1 | -2.728860000 | -0.302989000 | 3.429692000  |
| 1 | -2.849302000 | 0.774013000  | 4.827543000  |
| 6 | -2.253990000 | 3.037995000  | -0.619197000 |
| 1 | -1.821727000 | 3.956213000  | -1.017726000 |
| 1 | -1.815335000 | 2.198843000  | -1.167061000 |
| 1 | -3.327766000 | 3.046370000  | -0.825339000 |

132

b-Co

|    |              |              |              |
|----|--------------|--------------|--------------|
| 27 | 1.904718000  | 1.926063000  | 1.403700000  |
| 27 | -1.905234000 | 1.925047000  | -1.416906000 |
| 15 | 3.422997000  | 0.729537000  | 0.966947000  |
| 15 | -3.418854000 | 0.729008000  | -0.963623000 |
| 7  | 3.860058000  | -0.842535000 | 1.385802000  |
| 7  | 4.768415000  | 0.808057000  | -0.044683000 |
| 7  | -3.865125000 | -0.839543000 | -1.385429000 |
| 7  | -4.759756000 | 0.810933000  | 0.053883000  |
| 6  | 5.020851000  | -1.314367000 | 0.760565000  |
| 6  | 5.549400000  | -0.352350000 | -0.067009000 |
| 6  | 6.762055000  | -0.571556000 | -0.813593000 |
| 6  | 7.384239000  | 0.425822000  | -1.596501000 |
| 1  | 6.966881000  | 1.419379000  | -1.640318000 |
| 6  | 8.526961000  | 0.159927000  | -2.311727000 |
| 1  | 8.983099000  | 0.944621000  | -2.904105000 |
| 6  | 9.096099000  | -1.116362000 | -2.270153000 |
| 1  | 9.994160000  | -1.334595000 | -2.836474000 |
| 6  | 8.520011000  | -2.094226000 | -1.494822000 |
| 1  | 8.992998000  | -3.066068000 | -1.468148000 |
| 6  | 7.353085000  | -1.857388000 | -0.739964000 |
| 6  | 6.781230000  | -2.886036000 | 0.122534000  |
| 6  | 7.363605000  | -4.165752000 | 0.224048000  |
| 1  | 8.232306000  | -4.411805000 | -0.370694000 |
| 6  | 6.864782000  | -5.128639000 | 1.068547000  |
| 1  | 7.339646000  | -6.101604000 | 1.120349000  |
| 6  | 5.752475000  | -4.841078000 | 1.864647000  |
| 1  | 5.358920000  | -5.585941000 | 2.546655000  |
| 6  | 5.151270000  | -3.607811000 | 1.785926000  |
| 1  | 4.296116000  | -3.411958000 | 2.412499000  |
| 6  | 5.634177000  | -2.610589000 | 0.909550000  |
| 6  | 2.948106000  | -1.581398000 | 2.212675000  |
| 6  | 3.044993000  | -1.453543000 | 3.599911000  |
| 6  | 2.134940000  | -2.160816000 | 4.380958000  |
| 1  | 2.189145000  | -2.081600000 | 5.461343000  |
| 6  | 1.167481000  | -2.962509000 | 3.791084000  |
| 1  | 0.467545000  | -3.509288000 | 4.412933000  |

|   |              |              |              |
|---|--------------|--------------|--------------|
| 6 | 1.088370000  | -3.063814000 | 2.409301000  |
| 1 | 0.326470000  | -3.688390000 | 1.956315000  |
| 6 | 1.972044000  | -2.365125000 | 1.592279000  |
| 6 | 4.850084000  | 1.931654000  | -0.936876000 |
| 6 | 5.386752000  | 3.130853000  | -0.463702000 |
| 6 | 5.413599000  | 4.215747000  | -1.336085000 |
| 1 | 5.823743000  | 5.160018000  | -0.994684000 |
| 6 | 4.918021000  | 4.100951000  | -2.627050000 |
| 1 | 4.939434000  | 4.957764000  | -3.290904000 |
| 6 | 4.385355000  | 2.898237000  | -3.069487000 |
| 1 | 3.989095000  | 2.817922000  | -4.075722000 |
| 6 | 4.334903000  | 1.790619000  | -2.229000000 |
| 6 | -5.024762000 | -1.308330000 | -0.755668000 |
| 6 | -5.545248000 | -0.346358000 | 0.077039000  |
| 6 | -6.754918000 | -0.562789000 | 0.829266000  |
| 6 | -7.369275000 | 0.434996000  | 1.617798000  |
| 1 | -6.948500000 | 1.427142000  | 1.661112000  |
| 6 | -8.508647000 | 0.171271000  | 2.339144000  |
| 1 | -8.958790000 | 0.956137000  | 2.935861000  |
| 6 | -9.082109000 | -1.103113000 | 2.298298000  |
| 1 | -9.977365000 | -1.319687000 | 2.869678000  |
| 6 | -8.514040000 | -2.081077000 | 1.517202000  |
| 1 | -8.990269000 | -3.051349000 | 1.491288000  |
| 6 | -7.350974000 | -1.846306000 | 0.755755000  |
| 6 | -6.788289000 | -2.874549000 | -0.113274000 |
| 6 | -7.377032000 | -4.151231000 | -0.216315000 |
| 1 | -8.243756000 | -4.395460000 | 0.382066000  |
| 6 | -6.887221000 | -5.113173000 | -1.067150000 |
| 1 | -7.366818000 | -6.083755000 | -1.120034000 |
| 6 | -5.778042000 | -4.827677000 | -1.868353000 |
| 1 | -5.391763000 | -5.571732000 | -2.555383000 |
| 6 | -5.170826000 | -3.597433000 | -1.788408000 |
| 1 | -4.318293000 | -3.402992000 | -2.418995000 |
| 6 | -5.644420000 | -2.601379000 | -0.905682000 |
| 6 | -2.959221000 | -1.580106000 | -2.217615000 |
| 6 | -1.984069000 | -2.369584000 | -1.603258000 |
| 6 | -1.106119000 | -3.069241000 | -2.425746000 |
| 1 | -0.345535000 | -3.698894000 | -1.977523000 |
| 6 | -1.189603000 | -2.963092000 | -3.806843000 |
| 1 | -0.493974000 | -3.510548000 | -4.432907000 |
| 6 | -2.156127000 | -2.155816000 | -4.390688000 |
| 1 | -2.213930000 | -2.072941000 | -5.470607000 |
| 6 | -3.060729000 | -1.447704000 | -3.604170000 |
| 6 | -4.833296000 | 1.933177000  | 0.948499000  |
| 6 | -4.313559000 | 1.788509000  | 2.238155000  |
| 6 | -4.355388000 | 2.895663000  | 3.079850000  |
| 1 | -3.954984000 | 2.812566000  | 4.084237000  |
| 6 | -4.885251000 | 4.100994000  | 2.641299000  |
| 1 | -4.900051000 | 4.957070000  | 3.306266000  |
| 6 | -5.386813000 | 4.219063000  | 1.352882000  |
| 1 | -5.795133000 | 5.165147000  | 1.014377000  |
| 6 | -5.367746000 | 3.135070000  | 0.479232000  |
| 6 | 1.720994000  | 3.088421000  | 0.047238000  |
| 8 | 1.622433000  | 3.831609000  | -0.814215000 |
| 6 | 2.140335000  | 2.887779000  | 2.882365000  |
| 8 | 2.305338000  | 3.492123000  | 3.840518000  |
| 6 | 0.471603000  | 0.909632000  | 1.690108000  |

|   |              |              |              |
|---|--------------|--------------|--------------|
| 8 | -0.429620000 | 0.229923000  | 1.890793000  |
| 6 | -0.470350000 | 0.911386000  | -1.705354000 |
| 8 | 0.430646000  | 0.232369000  | -1.909259000 |
| 6 | -1.716418000 | 3.102330000  | -0.073613000 |
| 8 | -1.614958000 | 3.855055000  | 0.779167000  |
| 6 | -2.156779000 | 2.866061000  | -2.905494000 |
| 8 | -2.332244000 | 3.455789000  | -3.870994000 |
| 6 | -1.892180000 | -2.453555000 | -0.105544000 |
| 1 | -2.862111000 | -2.677133000 | 0.346311000  |
| 1 | -1.192821000 | -3.235711000 | 0.190599000  |
| 1 | -1.537650000 | -1.508907000 | 0.319205000  |
| 6 | -4.124774000 | -0.581247000 | -4.217725000 |
| 1 | -4.141109000 | -0.698413000 | -5.302033000 |
| 1 | -5.114303000 | -0.835205000 | -3.827590000 |
| 1 | -3.942789000 | 0.473828000  | -3.992646000 |
| 6 | -3.747770000 | 0.474495000  | 2.697945000  |
| 1 | -4.526856000 | -0.292909000 | 2.744328000  |
| 1 | -2.968581000 | 0.119283000  | 2.019291000  |
| 1 | -3.304200000 | 0.571907000  | 3.689259000  |
| 6 | -5.912779000 | 3.247290000  | -0.917638000 |
| 1 | -5.103327000 | 3.210613000  | -1.652892000 |
| 1 | -6.599557000 | 2.426594000  | -1.142153000 |
| 1 | -6.446435000 | 4.189673000  | -1.048234000 |
| 6 | 4.109766000  | -0.592551000 | 4.219869000  |
| 1 | 4.121116000  | -0.712136000 | 5.303976000  |
| 1 | 5.099943000  | -0.849447000 | 3.833294000  |
| 1 | 3.932704000  | 0.463711000  | 3.996245000  |
| 6 | 1.886508000  | -2.443988000 | 0.093945000  |
| 1 | 2.855458000  | -2.682060000 | -0.352809000 |
| 1 | 1.176110000  | -3.213687000 | -0.208217000 |
| 1 | 1.549784000  | -1.492802000 | -0.330494000 |
| 6 | 5.926033000  | 3.239302000  | 0.935658000  |
| 1 | 5.113534000  | 3.203366000  | 1.667553000  |
| 1 | 6.609854000  | 2.416451000  | 1.161429000  |
| 1 | 6.461520000  | 4.180101000  | 1.070187000  |
| 6 | 3.763319000  | 0.480128000  | -2.691641000 |
| 1 | 3.327347000  | 0.579785000  | -3.686089000 |
| 1 | 4.536874000  | -0.293092000 | -2.731970000 |
| 1 | 2.976902000  | 0.131270000  | -2.017967000 |

132

b-Ni

|    |              |              |              |
|----|--------------|--------------|--------------|
| 28 | -1.908553000 | -2.011039000 | 1.376264000  |
| 28 | 1.912746000  | -2.017293000 | -1.371304000 |
| 15 | -3.914443000 | -1.008654000 | 1.528460000  |
| 15 | 3.917554000  | -1.012336000 | -1.527103000 |
| 7  | -4.020042000 | 0.702432000  | 1.735378000  |
| 7  | -4.998862000 | -0.890081000 | 0.192038000  |
| 7  | 4.019716000  | 0.698518000  | -1.738066000 |
| 7  | 5.001146000  | -0.888186000 | -0.190469000 |
| 6  | -5.023435000 | 1.274341000  | 0.947956000  |
| 6  | -5.568094000 | 0.376626000  | 0.058945000  |
| 6  | -6.604311000 | 0.772715000  | -0.864261000 |
| 6  | -7.253938000 | -0.129135000 | -1.736621000 |
| 1  | -7.027425000 | -1.182658000 | -1.693833000 |
| 6  | -8.183906000 | 0.304874000  | -2.650693000 |

|   |              |              |              |
|---|--------------|--------------|--------------|
| 1 | -8.663696000 | -0.410954000 | -3.308230000 |
| 6 | -8.504753000 | 1.663371000  | -2.730103000 |
| 1 | -9.225520000 | 2.014662000  | -3.459535000 |
| 6 | -7.915901000 | 2.552752000  | -1.862942000 |
| 1 | -8.196800000 | 3.594804000  | -1.931881000 |
| 6 | -6.973103000 | 2.142414000  | -0.899165000 |
| 6 | -6.429261000 | 3.077714000  | 0.078192000  |
| 6 | -6.851728000 | 4.421363000  | 0.137209000  |
| 1 | -7.557516000 | 4.798091000  | -0.590565000 |
| 6 | -6.407367000 | 5.279648000  | 1.115147000  |
| 1 | -6.755231000 | 6.306199000  | 1.132446000  |
| 6 | -5.529628000 | 4.814385000  | 2.100646000  |
| 1 | -5.200474000 | 5.474285000  | 2.895129000  |
| 6 | -5.087460000 | 3.514147000  | 2.067093000  |
| 1 | -4.418761000 | 3.171009000  | 2.842309000  |
| 6 | -5.497978000 | 2.628963000  | 1.045612000  |
| 6 | -2.945313000 | 1.427401000  | 2.338913000  |
| 6 | -2.751978000 | 1.320809000  | 3.722217000  |
| 6 | -1.709233000 | 2.040484000  | 4.299394000  |
| 1 | -1.546175000 | 1.967755000  | 5.369493000  |
| 6 | -0.894095000 | 2.855828000  | 3.527400000  |
| 1 | -0.092689000 | 3.418728000  | 3.992499000  |
| 6 | -1.097332000 | 2.938550000  | 2.158982000  |
| 1 | -0.450191000 | 3.564634000  | 1.553735000  |
| 6 | -2.106548000 | 2.210443000  | 1.535265000  |
| 6 | -5.109082000 | -1.984026000 | -0.722853000 |
| 6 | -5.882048000 | -3.094176000 | -0.365419000 |
| 6 | -5.969866000 | -4.148740000 | -1.271581000 |
| 1 | -6.567230000 | -5.017719000 | -1.016422000 |
| 6 | -5.315210000 | -4.091923000 | -2.493781000 |
| 1 | -5.396539000 | -4.918647000 | -3.190589000 |
| 6 | -4.553512000 | -2.980792000 | -2.826119000 |
| 1 | -4.034026000 | -2.944227000 | -3.777405000 |
| 6 | -4.428261000 | -1.912823000 | -1.943405000 |
| 6 | 5.020791000  | 1.274747000  | -0.950924000 |
| 6 | 5.567067000  | 0.380228000  | -0.059679000 |
| 6 | 6.601918000  | 0.780633000  | 0.863226000  |
| 6 | 7.254170000  | -0.118116000 | 1.736828000  |
| 1 | 7.030895000  | -1.172380000 | 1.695366000  |
| 6 | 8.182667000  | 0.319936000  | 2.650464000  |
| 1 | 8.664637000  | -0.393557000 | 3.308941000  |
| 6 | 8.499382000  | 1.679511000  | 2.728181000  |
| 1 | 9.218974000  | 2.033897000  | 3.457282000  |
| 6 | 7.908095000  | 2.565950000  | 1.859674000  |
| 1 | 8.185920000  | 3.608927000  | 1.927113000  |
| 6 | 6.966776000  | 2.151402000  | 0.896230000  |
| 6 | 6.420808000  | 3.083556000  | -0.082948000 |
| 6 | 6.839297000  | 4.428361000  | -0.143540000 |
| 1 | 7.543103000  | 4.808282000  | 0.584493000  |
| 6 | 6.393565000  | 5.283807000  | -1.123346000 |
| 1 | 6.738300000  | 6.311389000  | -1.141865000 |
| 6 | 5.518387000  | 4.814330000  | -2.109114000 |
| 1 | 5.188271000  | 5.471908000  | -2.905127000 |
| 6 | 5.079934000  | 3.512855000  | -2.073952000 |
| 1 | 4.413166000  | 3.166606000  | -2.849456000 |
| 6 | 5.491771000  | 2.630513000  | -1.050550000 |
| 6 | 2.944266000  | 1.419506000  | -2.344988000 |

|   |              |              |              |
|---|--------------|--------------|--------------|
| 6 | 2.102008000  | 2.201692000  | -1.544164000 |
| 6 | 1.091847000  | 2.925770000  | -2.170903000 |
| 1 | 0.441600000  | 3.550289000  | -1.567506000 |
| 6 | 0.891055000  | 2.840030000  | -3.539495000 |
| 1 | 0.088717000  | 3.399647000  | -4.006943000 |
| 6 | 1.709684000  | 2.025491000  | -4.308607000 |
| 1 | 1.548507000  | 1.950199000  | -5.378813000 |
| 6 | 2.753426000  | 1.309681000  | -3.728356000 |
| 6 | 5.112766000  | -1.979272000 | 0.727630000  |
| 6 | 4.432230000  | -1.905352000 | 1.948128000  |
| 6 | 4.559341000  | -2.970480000 | 2.834067000  |
| 1 | 4.040253000  | -2.931628000 | 3.785481000  |
| 6 | 5.322507000  | -4.081520000 | 2.504886000  |
| 1 | 5.405395000  | -4.905900000 | 3.204278000  |
| 6 | 5.976747000  | -4.141167000 | 1.282574000  |
| 1 | 6.575224000  | -5.010083000 | 1.029832000  |
| 6 | 5.887127000  | -3.089505000 | 0.373270000  |
| 6 | -1.775055000 | -2.913086000 | -0.193039000 |
| 8 | -1.645785000 | -3.509198000 | -1.153473000 |
| 6 | -1.889683000 | -3.183179000 | 2.782631000  |
| 8 | -1.846127000 | -3.914898000 | 3.652690000  |
| 6 | -0.602871000 | -0.772536000 | 1.595472000  |
| 8 | 0.261030000  | -0.047681000 | 1.753585000  |
| 6 | 0.605017000  | -0.782191000 | -1.596621000 |
| 8 | -0.260601000 | -0.060084000 | -1.757937000 |
| 6 | 1.779464000  | -2.912818000 | 0.201742000  |
| 8 | 1.650332000  | -3.504930000 | 1.164678000  |
| 6 | 1.898337000  | -3.195593000 | -2.772629000 |
| 8 | 1.858442000  | -3.931154000 | -3.639615000 |
| 6 | 2.260258000  | 2.261423000  | -0.050943000 |
| 1 | 3.037233000  | 2.974863000  | 0.240687000  |
| 1 | 1.323249000  | 2.564265000  | 0.417968000  |
| 1 | 2.537166000  | 1.288804000  | 0.357409000  |
| 6 | 3.664357000  | 0.462039000  | -4.574432000 |
| 1 | 3.502276000  | 0.664286000  | -5.634327000 |
| 1 | 4.714065000  | 0.653120000  | -4.337222000 |
| 1 | 3.487388000  | -0.604800000 | -4.406561000 |
| 6 | 3.591702000  | -0.708771000 | 2.288592000  |
| 1 | 4.198841000  | 0.197171000  | 2.375003000  |
| 1 | 2.844437000  | -0.531186000 | 1.511633000  |
| 1 | 3.066673000  | -0.859408000 | 3.232437000  |
| 6 | 6.636456000  | -3.126994000 | -0.931156000 |
| 1 | 5.955795000  | -3.243802000 | -1.779367000 |
| 1 | 7.188569000  | -2.197182000 | -1.091075000 |
| 1 | 7.342858000  | -3.958384000 | -0.945386000 |
| 6 | -3.659678000 | 0.472744000  | 4.571329000  |
| 1 | -3.495491000 | 0.676365000  | 5.630634000  |
| 1 | -4.710182000 | 0.662191000  | 4.336259000  |
| 1 | -3.481748000 | -0.594043000 | 4.404233000  |
| 6 | -2.268113000 | 2.267668000  | 0.042321000  |
| 1 | -3.047678000 | 2.978687000  | -0.248371000 |
| 1 | -1.333156000 | 2.572931000  | -0.429080000 |
| 1 | -2.543441000 | 1.293881000  | -0.364276000 |
| 6 | -6.631551000 | -3.128791000 | 0.938988000  |
| 1 | -5.950875000 | -3.243294000 | 1.787512000  |
| 1 | -7.184019000 | -2.198814000 | 1.096648000  |
| 1 | -7.337621000 | -3.960429000 | 0.955150000  |

|   |              |              |              |
|---|--------------|--------------|--------------|
| 6 | -3.589185000 | -0.716129000 | -2.286957000 |
| 1 | -3.065085000 | -0.867902000 | -3.231129000 |
| 1 | -4.197345000 | 0.189043000  | -2.374200000 |
| 1 | -2.841184000 | -0.536550000 | -1.511160000 |

128

c-Fe

|    |              |              |              |
|----|--------------|--------------|--------------|
| 26 | -0.080471000 | -0.160083000 | -1.382352000 |
| 15 | 1.775252000  | 0.029462000  | 0.017257000  |
| 7  | 3.046473000  | 1.175257000  | -0.249617000 |
| 7  | 2.916735000  | -1.262449000 | -0.009191000 |
| 6  | 4.316870000  | 0.579171000  | -0.108333000 |
| 6  | 4.236452000  | -0.770716000 | 0.075915000  |
| 6  | 5.384925000  | -1.568808000 | 0.379426000  |
| 6  | 5.282306000  | -2.926278000 | 0.756614000  |
| 1  | 4.310295000  | -3.395299000 | 0.813245000  |
| 6  | 6.401386000  | -3.657730000 | 1.069312000  |
| 1  | 6.301568000  | -4.696974000 | 1.361324000  |
| 6  | 7.666467000  | -3.057282000 | 1.019770000  |
| 1  | 8.552518000  | -3.630356000 | 1.268092000  |
| 6  | 7.783408000  | -1.732519000 | 0.672261000  |
| 1  | 8.770012000  | -1.288660000 | 0.666213000  |
| 6  | 6.656928000  | -0.949229000 | 0.345337000  |
| 6  | 6.763431000  | 0.457957000  | -0.009042000 |
| 6  | 8.016030000  | 1.087970000  | -0.157140000 |
| 1  | 8.924178000  | 0.522462000  | 0.003620000  |
| 6  | 8.128269000  | 2.408261000  | -0.521150000 |
| 1  | 9.107826000  | 2.859534000  | -0.629831000 |
| 6  | 6.973286000  | 3.159072000  | -0.768080000 |
| 1  | 7.050800000  | 4.195644000  | -1.075873000 |
| 6  | 5.734735000  | 2.582468000  | -0.626808000 |
| 1  | 4.860236000  | 3.179608000  | -0.833480000 |
| 6  | 5.593216000  | 1.232046000  | -0.232228000 |
| 6  | 2.777999000  | 2.558549000  | -0.003716000 |
| 6  | 2.984236000  | 3.091846000  | 1.275830000  |
| 6  | 2.711958000  | 4.441291000  | 1.477608000  |
| 1  | 2.857091000  | 4.866790000  | 2.464531000  |
| 6  | 2.229989000  | 5.234880000  | 0.447798000  |
| 1  | 2.011152000  | 6.281528000  | 0.627529000  |
| 6  | 2.038262000  | 4.691881000  | -0.813937000 |
| 1  | 1.689680000  | 5.320040000  | -1.627740000 |
| 6  | 2.321449000  | 3.351550000  | -1.064882000 |
| 6  | 2.603842000  | -2.493101000 | -0.671834000 |
| 6  | 1.797149000  | -3.429197000 | -0.006689000 |
| 6  | 1.486113000  | -4.620963000 | -0.657894000 |
| 1  | 0.881016000  | -5.355410000 | -0.138971000 |
| 6  | 1.956835000  | -4.883646000 | -1.933798000 |
| 1  | 1.706470000  | -5.816130000 | -2.427468000 |
| 6  | 2.768235000  | -3.956478000 | -2.569471000 |
| 1  | 3.150216000  | -4.163572000 | -3.563678000 |
| 6  | 3.114010000  | -2.754883000 | -1.955963000 |
| 8  | 1.575537000  | -0.377170000 | -3.780132000 |
| 6  | 0.991076000  | -0.316942000 | -2.798052000 |
| 8  | -2.447294000 | -0.286468000 | -3.108034000 |
| 6  | -1.550952000 | -0.247482000 | -2.398125000 |
| 26 | 0.064701000  | 0.224287000  | 1.229973000  |

|    |              |              |              |
|----|--------------|--------------|--------------|
| 15 | -1.770308000 | 0.046023000  | 0.310035000  |
| 7  | -2.928827000 | -1.211265000 | 0.303720000  |
| 7  | -2.989057000 | 1.202256000  | -0.027425000 |
| 6  | -4.214744000 | -0.763914000 | -0.065656000 |
| 6  | -4.234588000 | 0.588843000  | -0.280626000 |
| 6  | -5.401113000 | 1.262357000  | -0.774828000 |
| 6  | -5.391080000 | 2.617966000  | -1.174896000 |
| 1  | -4.472219000 | 3.183497000  | -1.139774000 |
| 6  | -6.533673000 | 3.235931000  | -1.619076000 |
| 1  | -6.498949000 | 4.276142000  | -1.922281000 |
| 6  | -7.734990000 | 2.519937000  | -1.685963000 |
| 1  | -8.641271000 | 3.003277000  | -2.032437000 |
| 6  | -7.758260000 | 1.191873000  | -1.333667000 |
| 1  | -8.693798000 | 0.657013000  | -1.425673000 |
| 6  | -6.602645000 | 0.520518000  | -0.882071000 |
| 6  | -6.607286000 | -0.902080000 | -0.576590000 |
| 6  | -7.788967000 | -1.667456000 | -0.656596000 |
| 1  | -8.725074000 | -1.185565000 | -0.904003000 |
| 6  | -7.797184000 | -3.022286000 | -0.429032000 |
| 1  | -8.725562000 | -3.577470000 | -0.498853000 |
| 6  | -6.601222000 | -3.676840000 | -0.116508000 |
| 1  | -6.590418000 | -4.747940000 | 0.050640000  |
| 6  | -5.432300000 | -2.962751000 | -0.015029000 |
| 1  | -4.527887000 | -3.493528000 | 0.233866000  |
| 6  | -5.401467000 | -1.564120000 | -0.222438000 |
| 6  | -2.590019000 | -2.460516000 | 0.920641000  |
| 6  | -2.056567000 | -3.495399000 | 0.141946000  |
| 6  | -1.793645000 | -4.716353000 | 0.758690000  |
| 1  | -1.419232000 | -5.538014000 | 0.158277000  |
| 6  | -2.012857000 | -4.893775000 | 2.115799000  |
| 1  | -1.801972000 | -5.850848000 | 2.579891000  |
| 6  | -2.507426000 | -3.846609000 | 2.879363000  |
| 1  | -2.676005000 | -3.982747000 | 3.942071000  |
| 6  | -2.810657000 | -2.620012000 | 2.295072000  |
| 6  | -2.821681000 | 2.561986000  | 0.399736000  |
| 6  | -2.022585000 | 3.420593000  | -0.366568000 |
| 6  | -1.846158000 | 4.731913000  | 0.062786000  |
| 1  | -1.214430000 | 5.395427000  | -0.517753000 |
| 6  | -2.460846000 | 5.189093000  | 1.217170000  |
| 1  | -2.315105000 | 6.212959000  | 1.542342000  |
| 6  | -3.254258000 | 4.330077000  | 1.961444000  |
| 1  | -3.727937000 | 4.684368000  | 2.870890000  |
| 6  | -3.440999000 | 3.005276000  | 1.576205000  |
| 8  | -0.014193000 | 2.979965000  | 2.236118000  |
| 6  | 0.027377000  | 1.945560000  | 1.749706000  |
| 8  | 0.349371000  | -0.787448000 | 3.969673000  |
| 6  | 0.244069000  | -0.411311000 | 2.892425000  |
| 6  | -1.372122000 | 2.953989000  | -1.635122000 |
| 1  | -0.572375000 | 2.236681000  | -1.411342000 |
| 1  | -2.089224000 | 2.461410000  | -2.295317000 |
| 1  | -0.913556000 | 3.788201000  | -2.168130000 |
| 6  | -4.293467000 | 2.092334000  | 2.410868000  |
| 1  | -5.266258000 | 1.918422000  | 1.941088000  |
| 1  | -3.817123000 | 1.120522000  | 2.539773000  |
| 1  | -4.464388000 | 2.525797000  | 3.397311000  |
| 6  | 2.207561000  | 2.801180000  | -2.459513000 |
| 1  | 2.998743000  | 2.078077000  | -2.665071000 |

|   |              |              |              |
|---|--------------|--------------|--------------|
| 1 | 1.255384000  | 2.288422000  | -2.614153000 |
| 1 | 2.267662000  | 3.605367000  | -3.195240000 |
| 6 | 3.487515000  | 2.237789000  | 2.406324000  |
| 1 | 3.365544000  | 2.754990000  | 3.358999000  |
| 1 | 2.945822000  | 1.290544000  | 2.459083000  |
| 1 | 4.548603000  | 2.003044000  | 2.278604000  |
| 6 | 4.048880000  | -1.817437000 | -2.674438000 |
| 1 | 5.080630000  | -1.985234000 | -2.350522000 |
| 1 | 3.996659000  | -1.989100000 | -3.750390000 |
| 1 | 3.819563000  | -0.769196000 | -2.488726000 |
| 6 | 1.312028000  | -3.197652000 | 1.397411000  |
| 1 | 0.356134000  | -2.663488000 | 1.405211000  |
| 1 | 1.145960000  | -4.148383000 | 1.906826000  |
| 1 | 2.025471000  | -2.602465000 | 1.969799000  |
| 6 | -3.380818000 | -1.499884000 | 3.115874000  |
| 1 | -4.332204000 | -1.152904000 | 2.703323000  |
| 1 | -3.547104000 | -1.817490000 | 4.145832000  |
| 1 | -2.692070000 | -0.650341000 | 3.128488000  |
| 6 | -1.797548000 | -3.322150000 | -1.326795000 |
| 1 | -2.606599000 | -2.778014000 | -1.816697000 |
| 1 | -0.863724000 | -2.769434000 | -1.492202000 |
| 1 | -1.678514000 | -4.290565000 | -1.814903000 |

128

c-Co

|    |              |              |              |
|----|--------------|--------------|--------------|
| 27 | -0.045014000 | -0.385678000 | -1.194541000 |
| 15 | 1.754214000  | -0.007174000 | -0.084019000 |
| 7  | 2.973263000  | 1.206504000  | -0.233211000 |
| 7  | 3.001192000  | -1.187857000 | 0.087224000  |
| 6  | 4.268147000  | 0.737042000  | -0.027557000 |
| 6  | 4.273974000  | -0.615929000 | 0.204903000  |
| 6  | 5.474847000  | -1.320956000 | 0.561549000  |
| 6  | 5.469787000  | -2.665316000 | 0.991453000  |
| 1  | 4.539189000  | -3.208871000 | 1.045868000  |
| 6  | 6.633086000  | -3.297795000 | 1.356869000  |
| 1  | 6.603338000  | -4.329568000 | 1.687720000  |
| 6  | 7.848176000  | -2.605473000 | 1.312070000  |
| 1  | 8.769119000  | -3.098221000 | 1.601972000  |
| 6  | 7.870463000  | -1.288747000 | 0.916578000  |
| 1  | 8.820084000  | -0.771114000 | 0.918650000  |
| 6  | 6.696636000  | -0.608065000 | 0.535279000  |
| 6  | 6.713073000  | 0.796255000  | 0.142328000  |
| 6  | 7.924071000  | 1.503746000  | 0.006833000  |
| 1  | 8.863526000  | 1.001141000  | 0.192114000  |
| 6  | 7.958189000  | 2.824104000  | -0.374490000 |
| 1  | 8.908941000  | 3.335495000  | -0.471800000 |
| 6  | 6.762756000  | 3.494453000  | -0.648159000 |
| 1  | 6.775275000  | 4.531554000  | -0.963147000 |
| 6  | 5.561950000  | 2.836561000  | -0.526712000 |
| 1  | 4.656831000  | 3.376047000  | -0.755032000 |
| 6  | 5.500758000  | 1.484189000  | -0.122517000 |
| 6  | 2.580895000  | 2.582331000  | -0.256412000 |
| 6  | 2.575173000  | 3.308078000  | 0.939521000  |
| 6  | 2.148730000  | 4.632367000  | 0.896907000  |
| 1  | 2.116786000  | 5.205871000  | 1.816621000  |
| 6  | 1.749756000  | 5.213262000  | -0.297639000 |



|    |              |              |              |
|----|--------------|--------------|--------------|
| 1  | 1.409376000  | 6.242849000  | -0.310232000 |
| 6  | 1.800895000  | 4.485674000  | -1.478269000 |
| 1  | 1.515596000  | 4.950378000  | -2.416272000 |
| 6  | 2.228611000  | 3.160500000  | -1.480800000 |
| 6  | 2.848165000  | -2.492848000 | -0.507449000 |
| 6  | 2.220314000  | -3.520822000 | 0.203266000  |
| 6  | 2.131092000  | -4.777004000 | -0.391876000 |
| 1  | 1.645459000  | -5.580293000 | 0.151968000  |
| 6  | 2.653356000  | -5.008279000 | -1.653614000 |
| 1  | 2.579290000  | -5.992862000 | -2.101499000 |
| 6  | 3.254701000  | -3.971993000 | -2.351353000 |
| 1  | 3.638530000  | -4.144142000 | -3.351263000 |
| 6  | 3.350450000  | -2.697451000 | -1.802096000 |
| 8  | 0.124003000  | -3.029456000 | -2.467358000 |
| 6  | 0.081157000  | -2.040675000 | -1.897371000 |
| 8  | -0.555507000 | 0.864269000  | -3.796810000 |
| 6  | -0.348802000 | 0.434724000  | -2.755757000 |
| 27 | 0.034154000  | 0.317178000  | 1.182025000  |
| 15 | -1.763784000 | -0.016953000 | 0.067750000  |
| 7  | -3.005029000 | -1.201271000 | 0.250192000  |
| 7  | -2.988207000 | 1.180135000  | -0.145802000 |
| 6  | -4.289185000 | -0.719703000 | 0.014573000  |
| 6  | -4.269532000 | 0.626955000  | -0.256469000 |
| 6  | -5.455017000 | 1.342752000  | -0.640783000 |
| 6  | -5.423489000 | 2.676031000  | -1.103201000 |
| 1  | -4.482669000 | 3.200717000  | -1.167855000 |
| 6  | -6.573873000 | 3.321296000  | -1.486638000 |
| 1  | -6.524114000 | 4.344109000  | -1.841997000 |
| 6  | -7.802019000 | 2.653314000  | -1.427979000 |
| 1  | -8.712975000 | 3.156465000  | -1.731244000 |
| 6  | -7.849895000 | 1.346854000  | -1.002008000 |
| 1  | -8.809207000 | 0.847423000  | -0.993581000 |
| 6  | -6.689843000 | 0.653249000  | -0.602133000 |
| 6  | -6.732974000 | -0.741972000 | -0.180177000 |
| 6  | -7.956545000 | -1.427500000 | -0.044551000 |
| 1  | -8.885860000 | -0.913130000 | -0.247732000 |
| 6  | -8.015971000 | -2.740983000 | 0.356841000  |
| 1  | -8.975916000 | -3.235059000 | 0.453328000  |
| 6  | -6.834146000 | -3.427422000 | 0.649157000  |
| 1  | -6.866423000 | -4.460119000 | 0.976943000  |
| 6  | -5.621743000 | -2.790926000 | 0.529002000  |
| 1  | -4.727241000 | -3.342133000 | 0.771121000  |
| 6  | -5.534702000 | -1.445006000 | 0.108468000  |
| 6  | -2.621156000 | -2.570142000 | 0.405468000  |
| 6  | -2.546659000 | -3.388999000 | -0.725107000 |
| 6  | -2.088170000 | -4.692975000 | -0.555825000 |
| 1  | -1.998988000 | -5.337366000 | -1.423438000 |
| 6  | -1.736790000 | -5.165319000 | 0.700151000  |
| 1  | -1.370926000 | -6.180029000 | 0.812683000  |
| 6  | -1.875058000 | -4.351586000 | 1.816733000  |
| 1  | -1.633965000 | -4.735362000 | 2.802389000  |
| 6  | -2.330894000 | -3.042320000 | 1.690747000  |
| 6  | -2.805410000 | 2.500669000  | 0.403865000  |
| 6  | -2.135392000 | 3.481016000  | -0.335106000 |
| 6  | -1.996178000 | 4.749870000  | 0.222446000  |
| 1  | -1.473984000 | 5.514739000  | -0.342252000 |
| 6  | -2.517886000 | 5.041821000  | 1.471822000  |

|   |              |              |              |
|---|--------------|--------------|--------------|
| 1 | -2.405086000 | 6.035557000  | 1.890469000  |
| 6 | -3.172441000 | 4.055176000  | 2.193013000  |
| 1 | -3.559636000 | 4.275141000  | 3.182166000  |
| 6 | -3.314599000 | 2.768316000  | 1.683974000  |
| 8 | -0.148381000 | 2.910733000  | 2.549070000  |
| 6 | -0.090413000 | 1.944226000  | 1.943279000  |
| 8 | 0.523395000  | -1.076330000 | 3.714777000  |
| 6 | 0.326312000  | -0.585355000 | 2.699354000  |
| 6 | -1.585006000 | 3.198384000  | -1.700679000 |
| 1 | -0.602064000 | 2.729750000  | -1.616749000 |
| 1 | -2.230411000 | 2.518495000  | -2.259397000 |
| 1 | -1.467932000 | 4.122335000  | -2.269907000 |
| 6 | -3.975227000 | 1.703967000  | 2.518039000  |
| 1 | -4.994656000 | 1.498864000  | 2.178581000  |
| 1 | -3.419885000 | 0.763929000  | 2.473544000  |
| 1 | -4.023836000 | 2.019455000  | 3.561319000  |
| 6 | 2.419955000  | 2.416591000  | -2.773431000 |
| 1 | 3.486970000  | 2.368451000  | -3.018557000 |
| 1 | 2.055712000  | 1.392132000  | -2.713989000 |
| 1 | 1.904247000  | 2.918767000  | -3.593252000 |
| 6 | 3.067153000  | 2.696045000  | 2.221594000  |
| 1 | 2.772232000  | 3.305477000  | 3.076460000  |
| 1 | 2.671004000  | 1.688362000  | 2.364117000  |
| 1 | 4.159359000  | 2.621129000  | 2.212912000  |
| 6 | 3.955418000  | -1.579297000 | -2.607969000 |
| 1 | 4.970063000  | -1.343195000 | -2.274448000 |
| 1 | 4.002927000  | -1.858161000 | -3.661674000 |
| 1 | 3.361673000  | -0.665073000 | -2.525596000 |
| 6 | 1.653161000  | -3.300142000 | 1.573273000  |
| 1 | 0.645331000  | -2.884581000 | 1.497136000  |
| 1 | 1.583720000  | -4.241863000 | 2.120837000  |
| 1 | 2.259516000  | -2.600262000 | 2.150216000  |
| 6 | -2.617908000 | -2.202205000 | 2.904409000  |
| 1 | -3.700781000 | -2.099077000 | 3.035991000  |
| 1 | -2.205567000 | -2.661810000 | 3.803486000  |
| 1 | -2.206196000 | -1.197745000 | 2.812651000  |
| 6 | -3.020719000 | -2.900561000 | -2.065697000 |
| 1 | -2.670788000 | -1.887818000 | -2.274883000 |
| 1 | -2.670855000 | -3.557575000 | -2.862359000 |
| 1 | -4.115347000 | -2.880443000 | -2.091071000 |

128

7

|    |              |              |              |
|----|--------------|--------------|--------------|
| 28 | -0.077419000 | 0.331109000  | 1.233620000  |
| 15 | 1.770829000  | 0.002128000  | 0.164799000  |
| 7  | 2.996093000  | -1.195337000 | 0.363503000  |
| 7  | 2.974093000  | 1.214276000  | -0.046172000 |
| 6  | 4.272922000  | -0.709103000 | 0.045183000  |
| 6  | 4.248529000  | 0.628798000  | -0.233704000 |
| 6  | 5.409227000  | 1.333872000  | -0.687633000 |
| 6  | 5.354161000  | 2.670995000  | -1.138526000 |
| 1  | 4.412915000  | 3.199851000  | -1.129087000 |
| 6  | 6.478914000  | 3.308693000  | -1.599720000 |
| 1  | 6.413472000  | 4.333726000  | -1.946393000 |
| 6  | 7.704565000  | 2.630776000  | -1.630570000 |
| 1  | 8.594704000  | 3.129069000  | -1.997134000 |

|    |              |              |              |
|----|--------------|--------------|--------------|
| 6  | 7.775398000  | 1.324936000  | -1.207534000 |
| 1  | 8.730741000  | 0.820418000  | -1.262980000 |
| 6  | 6.641103000  | 0.638069000  | -0.727020000 |
| 6  | 6.701253000  | -0.748037000 | -0.287150000 |
| 6  | 7.926263000  | -1.442225000 | -0.209438000 |
| 1  | 8.843950000  | -0.943220000 | -0.490143000 |
| 6  | 8.001398000  | -2.740491000 | 0.234233000  |
| 1  | 8.961538000  | -3.241043000 | 0.284962000  |
| 6  | 6.836152000  | -3.403199000 | 0.634815000  |
| 1  | 6.884553000  | -4.420991000 | 1.004738000  |
| 6  | 5.623196000  | -2.761914000 | 0.567022000  |
| 1  | 4.741753000  | -3.292984000 | 0.890720000  |
| 6  | 5.517547000  | -1.433514000 | 0.094607000  |
| 6  | 2.610558000  | -2.565727000 | 0.461559000  |
| 6  | 2.571234000  | -3.359242000 | -0.691120000 |
| 6  | 2.124819000  | -4.672864000 | -0.565918000 |
| 1  | 2.068253000  | -5.296891000 | -1.451184000 |
| 6  | 1.749528000  | -5.183000000 | 0.668010000  |
| 1  | 1.395859000  | -6.205328000 | 0.745349000  |
| 6  | 1.848747000  | -4.396098000 | 1.807570000  |
| 1  | 1.588735000  | -4.808144000 | 2.776946000  |
| 6  | 2.290166000  | -3.078642000 | 1.725462000  |
| 6  | 2.869881000  | 2.470164000  | 0.655350000  |
| 6  | 2.210156000  | 3.544500000  | 0.046566000  |
| 6  | 2.149341000  | 4.760819000  | 0.721121000  |
| 1  | 1.637603000  | 5.595192000  | 0.253238000  |
| 6  | 2.725512000  | 4.910344000  | 1.971786000  |
| 1  | 2.671351000  | 5.862859000  | 2.486855000  |
| 6  | 3.358650000  | 3.832144000  | 2.570638000  |
| 1  | 3.791336000  | 3.940986000  | 3.559623000  |
| 6  | 3.435391000  | 2.596338000  | 1.934013000  |
| 8  | 0.055749000  | 2.963090000  | 2.530799000  |
| 6  | -0.001874000 | 2.020115000  | 1.896149000  |
| 8  | -0.650584000 | -1.260363000 | 3.628716000  |
| 6  | -0.407191000 | -0.728806000 | 2.649608000  |
| 28 | 0.077192000  | -0.328467000 | -1.233886000 |
| 15 | -1.771082000 | -0.000580000 | -0.164951000 |
| 7  | -2.997388000 | 1.195882000  | -0.361796000 |
| 7  | -2.973108000 | -1.213961000 | 0.045600000  |
| 6  | -4.273732000 | 0.708303000  | -0.043770000 |
| 6  | -4.248043000 | -0.629889000 | 0.233807000  |
| 6  | -5.408166000 | -1.336521000 | 0.686788000  |
| 6  | -5.351930000 | -2.674107000 | 1.136126000  |
| 1  | -4.410164000 | -3.202036000 | 1.126336000  |
| 6  | -6.476195000 | -3.313467000 | 1.596215000  |
| 1  | -6.409837000 | -4.338837000 | 1.941714000  |
| 6  | -7.702521000 | -2.636802000 | 1.627436000  |
| 1  | -8.592300000 | -3.136406000 | 1.993085000  |
| 6  | -7.774501000 | -1.330535000 | 1.205895000  |
| 1  | -8.730380000 | -0.827067000 | 1.261595000  |
| 6  | -6.640733000 | -0.641968000 | 0.726581000  |
| 6  | -6.702132000 | 0.744616000  | 0.288384000  |
| 6  | -7.927781000 | 1.437730000  | 0.211251000  |
| 1  | -8.845090000 | 0.937474000  | 0.490964000  |
| 6  | -8.004025000 | 2.736555000  | -0.230600000 |
| 1  | -8.964637000 | 3.236240000  | -0.280941000 |
| 6  | -6.839291000 | 3.400988000  | -0.629780000 |

|   |              |              |              |
|---|--------------|--------------|--------------|
| 1 | -6.888543000 | 4.419313000  | -0.998122000 |
| 6 | -5.625749000 | 2.760736000  | -0.562607000 |
| 1 | -4.744706000 | 3.293143000  | -0.885188000 |
| 6 | -5.518988000 | 1.431711000  | -0.092224000 |
| 6 | -2.612353000 | 2.566408000  | -0.460400000 |
| 6 | -2.571387000 | 3.359757000  | 0.692308000  |
| 6 | -2.124530000 | 4.673188000  | 0.566716000  |
| 1 | -2.066654000 | 5.297124000  | 1.451957000  |
| 6 | -1.750219000 | 5.183196000  | -0.667567000 |
| 1 | -1.395988000 | 6.205305000  | -0.745172000 |
| 6 | -1.851276000 | 4.396529000  | -1.807139000 |
| 1 | -1.592228000 | 4.808587000  | -2.776765000 |
| 6 | -2.293455000 | 3.079349000  | -1.724674000 |
| 6 | -2.867609000 | -2.469588000 | -0.656164000 |
| 6 | -2.206906000 | -3.543416000 | -0.047610000 |
| 6 | -2.144281000 | -4.759317000 | -0.722777000 |
| 1 | -1.631653000 | -5.593263000 | -0.255116000 |
| 6 | -2.719742000 | -4.908904000 | -1.973751000 |
| 1 | -2.664114000 | -5.861060000 | -2.489326000 |
| 6 | -3.354162000 | -3.831242000 | -2.572239000 |
| 1 | -3.786454000 | -3.940181000 | -3.561384000 |
| 6 | -3.432733000 | -2.595880000 | -1.934992000 |
| 8 | -0.052842000 | -2.959218000 | -2.533754000 |
| 6 | 0.003680000  | -2.016678000 | -1.898364000 |
| 8 | 0.642334000  | 1.265699000  | -3.629347000 |
| 6 | 0.402703000  | 0.733222000  | -2.649833000 |
| 6 | -1.563615000 | -3.400450000 | 1.298930000  |
| 1 | -0.589036000 | -2.913588000 | 1.203183000  |
| 1 | -2.174588000 | -2.793769000 | 1.969028000  |
| 1 | -1.395411000 | -4.376798000 | 1.756284000  |
| 6 | -4.096724000 | -1.440825000 | -2.634820000 |
| 1 | -5.092990000 | -1.244081000 | -2.228488000 |
| 1 | -3.516322000 | -0.522132000 | -2.527804000 |
| 1 | -4.201055000 | -1.655071000 | -3.699654000 |
| 6 | 2.538693000  | -2.270071000 | 2.969114000  |
| 1 | 3.616747000  | -2.181746000 | 3.142747000  |
| 1 | 2.142804000  | -1.258259000 | 2.887693000  |
| 1 | 2.089558000  | -2.747414000 | 3.841165000  |
| 6 | 3.076564000  | -2.841075000 | -2.009615000 |
| 1 | 2.712962000  | -3.457691000 | -2.832249000 |
| 1 | 2.769492000  | -1.808988000 | -2.187328000 |
| 1 | 4.171100000  | -2.861546000 | -2.023770000 |
| 6 | 4.097798000  | 1.440706000  | 2.634427000  |
| 1 | 5.093420000  | 1.241790000  | 2.227575000  |
| 1 | 4.203203000  | 1.655730000  | 3.698996000  |
| 1 | 3.515652000  | 0.522962000  | 2.528585000  |
| 6 | 1.565707000  | 3.401605000  | -1.299440000 |
| 1 | 0.589801000  | 2.917595000  | -1.202437000 |
| 1 | 1.399976000  | 4.377818000  | -1.758009000 |
| 1 | 2.174598000  | 2.792322000  | -1.969062000 |
| 6 | -2.544418000 | 2.271126000  | -2.968043000 |
| 1 | -3.622838000 | 2.181761000  | -3.138840000 |
| 1 | -2.098035000 | 2.749325000  | -3.841028000 |
| 1 | -2.147277000 | 1.259678000  | -2.888207000 |
| 6 | -3.075430000 | 2.841403000  | 2.011172000  |
| 1 | -2.766447000 | 1.809924000  | 2.189161000  |
| 1 | -2.712641000 | 3.458981000  | 2.833425000  |

1 -4.170019000 2.859912000 2.025721000
